# Supplementary material for: High clonality of Mycobacterium avium subsp. paratuberculosis field isolates from red deer revealed by two different methodological approaches of comparative genomic analysis
Source: Front Vet Sci. 2024 Feb 6;11:1301667. doi: 10.3389/fvets.2024.1301667 (PMC10876796; doi:10.3389/fvets.2024.1301667)
Supplement: Supplementary file 5 [file Table_5.XLSX]

## Sheet: Sheet3
Supplementary Tables High clonality of Mycobacterium avium subsp. paratuberculosis field isolates from red deer revealed by two different methodological approaches of comparative genomic analysis Silvia Turco1, Simone Russo2, Daniele Pietrucci3, Anita Filippi2, Marco Milanesi3, Camilla Luzzago4, Chiara Garbarino2, Giorgia Palladini2, Giovanni Chillemi3,5*, Matteo Ricchi2*. *Corresponding authors:…

## Sheet: TableS5a
Table S5: List of the 199 MAP virulence-related features (i.e. effector genes) from K10 downloaded from the VFDB database and blasted on the Mycobacterium avium isolates under comparison
	gene_symbol	description	species	category	M01	M02	M03	M04	M05	M06	M07	M08	M09	M10	M11	M12	M13	M14	M15	DT3	MRI063	MRI064	MRI083	MRI086	MRI090	MRI160	K10
VFG043449(gb|WP_003877927)	MAP_RS07985	alanine and proline-rich secreted protein Apa	Mycobacterium avium subsp. paratuberculosis K-10	MAP1569 (VF0865) - Adherence (VFC0001)	0	0	0	0	0	0	1	0	0	0	0	1	1	0	1	0	0	0	0	0	0	1	1
VFG031726(gb|WP_003873718)	regX3	two-component sensory transduction protein RegX	Mycobacterium avium subsp. paratuberculosis K-10	RegX3 (VF0858) - Regulation (VFC0301)	1	1	1	1	1	1	1	1	1	1	1	1	1	1	1	1	1	1	1	1	1	1	1
VFG031673(gb|WP_010950191)	senX3	two-component sensor histidine kinase	Mycobacterium avium subsp. paratuberculosis K-10	SenX3 (VF0857) - Regulation (VFC0301)	1	1	1	1	1	1	1	1	1	1	0	1	1	1	1	1	1	1	1	1	1	1	1
VFG031594(gb|WP_009979039)	sigL	sigma-70 family RNA polymerase sigma factor	Mycobacterium avium subsp. paratuberculosis K-10	Sigma L (VF0855) - Regulation (VFC0301)	1	1	1	1	1	0	1	1	1	1	1	1	1	1	1	1	1	1	1	1	1	1	1
VFG031514(gb|WP_003878184)	ptpA	low molecular weight phosphotyrosine protein phosphatase	Mycobacterium avium subsp. paratuberculosis K-10	Tyrosine phosphatase (VF0852) - Immune modulation (VFC0258)	1	1	1	1	1	1	1	1	1	1	1	1	1	1	1	1	1	1	1	1	1	1	1
VFG031461(gb|WP_003875860)	ndk	nucleoside-diphosphate kinase	Mycobacterium avium subsp. paratuberculosis K-10	Nucleoside diphosphate kinase (VF0851) - Immune modulation (VFC0258)	1	1	1	1	1	1	1	1	1	1	1	1	1	1	1	1	1	1	1	1	1	1	1
VFG031352(gb|WP_010949941)	ctpC	manganese-exporting P-type ATPase CtpC	Mycobacterium avium subsp. paratuberculosis K-10	P(1)-type Mn2+ transporting ATPase (VF0848) - Nutritional/Metabolic factor (VFC0272)	1	1	1	1	1	1	1	1	0	1	0	1	1	0	1	1	1	1	1	1	1	1	1
VFG031300(gb|WP_003879106)	mmpL11	MMPL family transporter	Mycobacterium avium subsp. paratuberculosis K-10	Heme uptake (VF0859) - Nutritional/Metabolic factor (VFC0272)	1	1	1	1	1	1	1	1	1	1	0	1	1	1	1	1	1	1	1	1	1	1	1
VFG031246(gb|WP_003874095)	mmpL3	MMPL family transporter	Mycobacterium avium subsp. paratuberculosis K-10	Heme uptake (VF0859) - Nutritional/Metabolic factor (VFC0272)	1	1	1	1	1	1	1	1	1	1	0	1	1	1	1	1	1	1	1	1	1	1	1
VFG031194(gb|WP_003874098)	MAP_RS18665	hemophore	Mycobacterium avium subsp. paratuberculosis K-10	Heme uptake (VF0859) - Nutritional/Metabolic factor (VFC0272)	1	1	1	1	0	0	1	0	0	0	0	1	0	0	1	1	1	1	1	0	1	1	1
VFG031089(gb|WP_003878078)	pafA	Pup--protein ligase	Mycobacterium avium subsp. paratuberculosis K-10	Proteasome-associated proteins (VF0847) - Stress survival (VFC0282)	1	1	1	1	1	1	1	1	1	1	1	1	0	1	1	1	1	1	1	1	1	1	1
VFG030986(gb|WP_003875682)	fadE29	acyl-CoA dehydrogenase family protein	Mycobacterium avium subsp. paratuberculosis K-10	FadE29 (VF0845) - Nutritional/Metabolic factor (VFC0272)	1	1	1	1	1	1	1	1	1	1	1	1	1	1	1	1	1	1	1	1	1	1	1
VFG030935(gb|WP_003877134)	fadE28	acyl-CoA/acyl-ACP dehydrogenase	Mycobacterium avium subsp. paratuberculosis K-10	FadE28 (VF0844) - Nutritional/Metabolic factor (VFC0272)	1	1	1	1	1	1	1	1	1	1	1	1	1	1	1	1	1	1	1	1	1	1	1
VFG030883(gb|WP_003875680)	cyp125	cytochrome P450	Mycobacterium avium subsp. paratuberculosis K-10	Cyp125 (VF0843) - Nutritional/Metabolic factor (VFC0272)	1	1	1	1	1	1	1	1	1	1	1	1	1	1	1	1	1	1	1	1	1	1	1
VFG030821(gb|WP_003876624)	icl2	isocitrate lyase ICL2	Mycobacterium avium subsp. paratuberculosis K-10	Trehalose-recycling ABC transporter (VF0842) - Nutritional/Metabolic factor (VFC0272)	1	1	1	1	0	1	1	1	1	1	1	1	1	1	1	1	1	1	1	1	1	1	1
VFG030675(gb|WP_003875535)	sugC	sn-glycerol-3-phosphate ABC transporter ATP-binding protein UgpC	Mycobacterium avium subsp. paratuberculosis K-10	Trehalose-recycling ABC transporter (VF0842) - Nutritional/Metabolic factor (VFC0272)	1	1	1	1	1	1	1	1	1	1	1	1	1	1	1	1	1	1	1	1	1	1	1
VFG030620(gb|WP_003875534)	sugB	carbohydrate ABC transporter permease	Mycobacterium avium subsp. paratuberculosis K-10	Trehalose-recycling ABC transporter (VF0842) - Nutritional/Metabolic factor (VFC0272)	1	1	1	1	1	1	1	1	1	1	1	1	1	1	1	1	1	1	1	1	1	1	1
VFG030566(gb|WP_003878455)	sugA	sugar ABC transporter permease	Mycobacterium avium subsp. paratuberculosis K-10	Trehalose-recycling ABC transporter (VF0842) - Nutritional/Metabolic factor (VFC0272)	1	0	1	1	0	1	1	1	1	0	1	1	0	1	1	1	1	1	1	1	1	1	1
VFG030513(gb|WP_003878456)	lpqY	extracellular solute-binding protein	Mycobacterium avium subsp. paratuberculosis K-10	Trehalose-recycling ABC transporter (VF0842) - Nutritional/Metabolic factor (VFC0272)	1	1	1	1	1	1	1	1	1	1	1	1	1	1	1	1	1	1	1	1	1	1	1
VFG030483(gb|WP_010949125)	MAP_RS22600	FkbM family methyltransferase	Mycobacterium avium subsp. paratuberculosis K-10	PDIM (VF0309) - Immune modulation (VFC0258)	0	1	1	0	1	1	1	1	1	1	1	1	1	1	1	1	1	1	1	1	1	1	1
VFG030391(gb|WP_003875182)	fadD13	acyl--CoA ligase	Mycobacterium avium subsp. paratuberculosis K-10	MymA operon (VF0840) - Immune modulation (VFC0258)	1	1	1	1	1	1	1	1	1	1	1	1	1	1	1	1	1	1	1	1	1	1	1
VFG030152(gb|WP_003878170)	caeA	alpha/beta hydrolase	Mycobacterium avium subsp. paratuberculosis K-10	Carboxylesterase (VF0839) - Effector delivery system (VFC0086)	0	0	0	0	0	0	1	0	0	1	1	0	1	0	0	1	1	1	1	1	1	1	1
VFG030111(gb|WP_003874576)	kefB	cation:proton antiporter	Mycobacterium avium subsp. paratuberculosis K-10	Potassium/proton antiporter (VF0838) - Immune modulation (VFC0258)	1	1	1	1	1	1	1	1	1	1	1	1	1	1	1	1	1	1	1	1	1	1	1
VFG030056(gb|WP_003877628)	lprG	LppX_LprAFG lipoprotein	Mycobacterium avium subsp. paratuberculosis K-10	Lipoprotein (VF0837) - Immune modulation (VFC0258)	1	1	1	1	1	1	1	1	1	1	1	1	1	1	1	1	1	1	1	1	1	1	1
VFG030039(gb|WP_003875893)	gap-like	GAP family protein	Mycobacterium avium subsp. paratuberculosis K-10	GPL locus (VF0841) - Immune modulation (VFC0258)	1	1	1	1	1	1	1	1	0	1	1	1	1	1	1	1	1	1	1	1	1	1	1
VFG029991(gb|WP_010949528)	pe	PE-PPE domain-containing protein	Mycobacterium avium subsp. paratuberculosis K-10	GPL locus (VF0841) - Immune modulation (VFC0258)	1	1	1	1	1	1	1	1	1	1	1	1	1	1	1	1	1	1	1	1	1	1	1
VFG029940(gb|WP_003878390)	fad23	AMP-binding protein	Mycobacterium avium subsp. paratuberculosis K-10	GPL locus (VF0841) - Immune modulation (VFC0258)	1	1	1	1	1	1	1	1	1	1	1	1	1	1	1	1	1	1	1	1	1	1	1
VFG029892	mmpL10	- Immune modulation (VFC0258)]	Mycobacterium avium subsp. paratuberculosis K-10	GPL locus (VF0841) - Immune modulation (VFC0258)	1	1	1	1	1	1	1	1	1	1	1	1	1	1	1	1	1	1	1	1	1	1	1
VFG029843(gb|WP_003875897)	papA3	condensation domain-containing protein	Mycobacterium avium subsp. paratuberculosis K-10	GPL locus (VF0841) - Immune modulation (VFC0258)	1	1	1	1	1	1	1	1	1	1	1	1	1	1	1	1	1	1	1	1	1	1	1
VFG029820(gb|WP_010949525)	pks	type I polyketide synthase	Mycobacterium avium subsp. paratuberculosis K-10	GPL locus (VF0841) - Immune modulation (VFC0258)	0	0	0	0	0	0	0	0	0	0	0	0	1	0	0	1	1	1	1	1	1	1	1
VFG029765(gb|WP_003879144)	fadE5	acyl-CoA dehydrogenase	Mycobacterium avium subsp. paratuberculosis K-10	GPL locus (VF0841) - Immune modulation (VFC0258)	1	1	1	1	1	1	1	1	0	1	0	1	1	1	1	1	1	1	1	1	1	1	1
VFG029735(gb|WP_003876332)	gap	GAP family protein	Mycobacterium avium subsp. paratuberculosis K-10	GPL locus (VF0841) - Immune modulation (VFC0258)	1	1	1	1	1	1	1	1	1	1	0	1	1	1	1	1	1	1	1	0	1	1	1
VFG029684(gb|WP_010949130)	mps1	non-ribosomal peptide synthetase	Mycobacterium avium subsp. paratuberculosis K-10	GPL locus (VF0841) - Immune modulation (VFC0258)	0	0	0	0	0	0	0	0	0	0	0	1	0	0	0	1	0	1	0	0	1	1	1
VFG029606(gb|WP_003877677)	atf	acyltransferase	Mycobacterium avium subsp. paratuberculosis K-10	GPL locus (VF0841) - Immune modulation (VFC0258)	1	1	1	1	1	1	1	1	1	1	1	1	1	1	1	1	1	1	1	1	1	1	1
VFG029487(gb|WP_003879222)	rmlA	glucose-1-phosphate thymidylyltransferase RfbA	Mycobacterium avium subsp. paratuberculosis K-10	GPL locus (VF0841) - Immune modulation (VFC0258)	1	1	1	1	1	1	1	1	1	1	1	1	1	1	1	1	1	1	1	1	1	1	1
VFG029470(gb|WP_003877631)	MAP_RS05820	hemophore-related protein	Mycobacterium avium subsp. paratuberculosis K-10	GPL locus (VF0841) - Immune modulation (VFC0258)	1	1	1	1	1	1	1	1	1	1	1	1	1	1	1	1	1	1	1	1	1	1	1
VFG029455(gb|WP_010949128)	mmpL4b	RND family transporter	Mycobacterium avium subsp. paratuberculosis K-10	GPL locus (VF0841) - Immune modulation (VFC0258)	1	1	1	1	1	1	1	1	1	1	1	1	1	1	1	1	1	1	1	1	1	1	1
VFG029432(gb|WP_010949129)	mmpL4a	RND family transporter	Mycobacterium avium subsp. paratuberculosis K-10	GPL locus (VF0841) - Immune modulation (VFC0258)	1	1	1	1	1	1	1	1	1	1	1	1	1	1	1	1	1	1	1	1	1	1	1
VFG029387(gb|WP_003876149)	mmpS4	MmpS family protein	Mycobacterium avium subsp. paratuberculosis K-10	GPL locus (VF0841) - Immune modulation (VFC0258)	1	1	1	1	1	1	1	1	1	1	1	1	1	1	1	1	1	1	1	1	1	1	1
VFG022345(gb|WP_003873939)	esxG	Type VII secretion system protein EsxG	Mycobacterium avium subsp. paratuberculosis K-10	ESX-3 (VF0521) - Effector delivery system (VFC0086)	1	1	1	1	1	1	1	1	1	1	1	1	1	1	1	1	1	1	1	1	1	1	1
VFG022324(gb|WP_172799602)	PPE26	PPE family protein	Mycobacterium avium subsp. paratuberculosis K-10	ESX-5 (VF0402) - Effector delivery system (VFC0086)	1	0	1	1	1	1	1	1	1	1	1	1	1	1	1	1	1	1	1	1	1	1	1
VFG022308(gb|WP_010949243)	PPE25	PPE family protein	Mycobacterium avium subsp. paratuberculosis K-10	ESX-5 (VF0402) - Effector delivery system (VFC0086)	0	1	1	1	1	1	1	1	1	1	1	1	1	1	1	1	1	1	1	1	1	1	1
VFG022298(gb|WP_003876470)	MAP_RS07655	ferredoxin	Mycobacterium avium subsp. paratuberculosis K-10	ESX-5 (VF0402) - Effector delivery system (VFC0086)	1	1	1	1	1	1	1	1	1	1	1	1	1	1	1	1	1	1	1	1	1	1	1
VFG022285	cyp143	- Effector delivery system (VFC0086)]	Mycobacterium avium subsp. paratuberculosis K-10	ESX-5 (VF0402) - Effector delivery system (VFC0086)	1	1	1	1	1	1	1	1	1	1	1	1	1	1	1	1	1	1	1	1	1	1	1
VFG022270(gb|WP_003879491)	eccB4	type VII secretion protein EccB	Mycobacterium avium subsp. paratuberculosis K-10	ESX-4 (T7SS) (VF0836) - Effector delivery system (VFC0086)	1	0	1	0	0	0	0	0	0	1	0	1	1	0	1	0	0	1	0	0	0	0	1
VFG022255(gb|WP_010950276)	mycP4	type VII secretion system ESX-4 serine protease mycosin MycP4	Mycobacterium avium subsp. paratuberculosis K-10	ESX-4 (T7SS) (VF0836) - Effector delivery system (VFC0086)	1	0	0	1	0	0	1	0	0	0	0	1	1	0	0	1	1	0	0	0	1	0	1
VFG022243(gb|WP_003873436)	eccD4	type VII secretion integral membrane protein EccD	Mycobacterium avium subsp. paratuberculosis K-10	ESX-4 (T7SS) (VF0836) - Effector delivery system (VFC0086)	0	0	1	0	0	0	1	0	0	0	0	1	1	0	0	0	0	0	0	0	0	0	1
VFG022229	eccC4	(VF0836	Mycobacterium avium subsp. paratuberculosis K-10	ESX-4 (T7SS) (VF0836) - Effector delivery system (VFC0086)	1	0	1	0	0	0	1	0	0	1	1	1	1	1	0	1	0	0	0	0	0	1	1
VFG022214(gb|WP_003873434)	MAP_RS21760	type VII secretion-associated protein	Mycobacterium avium subsp. paratuberculosis K-10	ESX-4 (T7SS) (VF0836) - Effector delivery system (VFC0086)	0	0	0	0	0	0	0	0	0	0	0	0	0	0	0	0	0	0	0	0	0	0	1
VFG022199(gb|WP_003879501)	esxU	WXG100 family type VII secretion target	Mycobacterium avium subsp. paratuberculosis K-10	ESX-4 (T7SS) (VF0836) - Effector delivery system (VFC0086)	1	1	1	1	1	1	1	1	1	1	1	1	1	1	1	1	1	1	1	1	1	1	1
VFG022183(gb|WP_003873432)	esxT	WXG100 family type VII secretion target	Mycobacterium avium subsp. paratuberculosis K-10	ESX-4 (T7SS) (VF0836) - Effector delivery system (VFC0086)	1	1	1	1	1	1	1	1	1	1	1	1	1	1	1	1	1	1	1	1	1	1	1
VFG022167	eccE3	- Effector delivery system (VFC0086)]	Mycobacterium avium subsp. paratuberculosis K-10	ESX-3 (VF0521) - Effector delivery system (VFC0086)	1	1	1	1	1	1	1	1	1	1	1	1	1	1	1	1	1	1	1	1	1	1	1
VFG022151(gb|WP_003879189)	mycP3	Type VII secretion system membrane-anchored mycosin MycP3	Mycobacterium avium subsp. paratuberculosis K-10	ESX-3 (VF0521) - Effector delivery system (VFC0086)	1	1	1	1	0	1	1	0	1	1	1	1	1	1	1	0	0	1	0	0	0	0	1
VFG022135(gb|WP_003879188)	eccD3	Type IIV secretion system transmembrane protein EccD3	Mycobacterium avium subsp. paratuberculosis K-10	ESX-3 (VF0521) - Effector delivery system (VFC0086)	1	1	1	1	1	1	1	0	0	1	1	1	1	0	1	0	1	1	0	0	1	1	1
VFG022119(gb|WP_003879186)	espG3	Type VII secretion system protein EspG3	Mycobacterium avium subsp. paratuberculosis K-10	ESX-3 (VF0521) - Effector delivery system (VFC0086)	1	1	1	1	1	1	1	1	1	1	1	1	1	1	1	1	1	1	1	1	1	1	1
VFG022103(gb|WP_003879185)	esxH	Type VII secretion system protein ESXH (10 kDa antigen	Mycobacterium avium subsp. paratuberculosis K-10	ESX-3 (VF0521) - Effector delivery system (VFC0086)	1	1	1	1	1	1	1	1	1	1	1	1	1	1	1	1	1	1	1	1	1	1	1
VFG022087(gb|WP_003873940)	PPE4	PPE family protein	Mycobacterium avium subsp. paratuberculosis K-10	ESX-3 (VF0521) - Effector delivery system (VFC0086)	0	0	0	0	0	0	0	0	0	0	0	0	0	0	0	0	0	0	0	0	0	0	1
VFG022071(gb|WP_010950108)	PE5	PE family protein	Mycobacterium avium subsp. paratuberculosis K-10	ESX-3 (VF0521) - Effector delivery system (VFC0086)	1	1	1	1	1	1	1	1	1	1	1	1	1	1	1	1	1	1	1	1	1	1	1
VFG022056(gb|WP_010950107)	eccC3	Type VII secretion system protein EccC3	Mycobacterium avium subsp. paratuberculosis K-10	ESX-3 (VF0521) - Effector delivery system (VFC0086)	1	1	1	1	1	1	1	0	0	1	0	1	1	0	1	1	1	1	1	1	1	1	1
VFG022040(gb|WP_003879179)	eccB3	Type VII secretion system protein EccB3	Mycobacterium avium subsp. paratuberculosis K-10	ESX-3 (VF0521) - Effector delivery system (VFC0086)	1	1	1	1	1	1	1	1	1	1	1	1	1	1	1	1	1	1	1	1	1	1	1
VFG022024(gb|WP_003873945)	eccA3	Type VII secretion system protein EccA3	Mycobacterium avium subsp. paratuberculosis K-10	ESX-3 (VF0521) - Effector delivery system (VFC0086)	1	1	1	1	1	1	1	0	1	1	1	1	1	1	1	1	1	1	1	1	1	1	1
VFG022016	eccB2	(VF0834	Mycobacterium avium subsp. paratuberculosis K-10	ESX-2 (T7SS) (VF0834) - Effector delivery system (VFC0086)	1	1	1	1	1	1	1	1	1	1	1	1	1	1	0	1	1	1	1	1	1	1	1
VFG022009(gb|WP_010950308)	eccC2	type VII secretion protein EccC	Mycobacterium avium subsp. paratuberculosis K-10	ESX-2 (T7SS) (VF0834) - Effector delivery system (VFC0086)	1	1	1	1	1	1	1	1	1	1	1	1	1	1	1	1	1	1	1	1	1	1	1
VFG022001(gb|WP_003876365)	PE36	PE domain-containing protein	Mycobacterium avium subsp. paratuberculosis K-10	ESX-2 (T7SS) (VF0834) - Effector delivery system (VFC0086)	1	1	1	1	1	1	1	1	1	1	1	1	1	1	1	1	1	1	1	1	1	1	1
VFG021993(gb|WP_003876908)	PPE69	PPE family protein	Mycobacterium avium subsp. paratuberculosis K-10	ESX-2 (T7SS) (VF0834) - Effector delivery system (VFC0086)	1	1	1	1	1	1	1	1	0	1	0	1	1	1	1	1	1	1	0	0	1	1	1
VFG021985(gb|WP_011723369)	esxD	WXG100 family type VII secretion target	Mycobacterium avium subsp. paratuberculosis K-10	ESX-2 (T7SS) (VF0834) - Effector delivery system (VFC0086)	1	1	1	1	1	1	1	1	1	1	1	1	1	1	1	1	1	1	1	1	1	1	1
VFG021977(gb|WP_003876587)	esxC	WXG100 family type VII secretion target	Mycobacterium avium subsp. paratuberculosis K-10	ESX-2 (T7SS) (VF0834) - Effector delivery system (VFC0086)	1	1	1	1	1	1	1	1	1	1	1	1	1	1	1	1	1	1	1	1	1	1	1
VFG021969(gb|WP_003876588)	espG2	ESX secretion-associated protein EspG	Mycobacterium avium subsp. paratuberculosis K-10	ESX-2 (T7SS) (VF0834) - Effector delivery system (VFC0086)	1	1	1	1	1	1	1	1	1	1	0	1	1	0	1	1	1	1	1	1	1	1	1
VFG021961(gb|WP_003876911)	MAP_RS00820	MinD/ParA family protein	Mycobacterium avium subsp. paratuberculosis K-10	ESX-2 (T7SS) (VF0834) - Effector delivery system (VFC0086)	1	1	1	1	1	1	1	1	1	1	1	1	1	1	1	1	1	1	1	1	1	1	1
VFG021953(gb|WP_003876912)	eccD2	type VII secretion integral membrane protein EccD	Mycobacterium avium subsp. paratuberculosis K-10	ESX-2 (T7SS) (VF0834) - Effector delivery system (VFC0086)	1	1	1	1	1	1	1	1	1	1	1	1	1	1	1	1	1	1	1	0	1	1	1
VFG021945(gb|WP_010948761)	mycP2	type VII secretion system ESX-2 serine protease mycosin MycP2	Mycobacterium avium subsp. paratuberculosis K-10	ESX-2 (T7SS) (VF0834) - Effector delivery system (VFC0086)	0	0	0	0	0	0	0	0	0	0	0	0	0	0	0	0	0	0	0	0	0	0	1
VFG021937	eccE2	(VF0834	Mycobacterium avium subsp. paratuberculosis K-10	ESX-2 (T7SS) (VF0834) - Effector delivery system (VFC0086)	1	0	0	0	0	0	1	0	0	0	0	0	1	0	0	1	1	1	1	1	1	1	1
VFG021929(gb|WP_042632956)	eccA2	type VII secretion system ESX-2 AAA family ATPase EccA2	Mycobacterium avium subsp. paratuberculosis K-10	ESX-2 (T7SS) (VF0834) - Effector delivery system (VFC0086)	1	1	1	1	1	1	1	1	1	1	1	1	1	1	1	1	1	1	1	1	1	1	1
VFG021913(gb|WP_003872292)	espR	ESX-1 transcriptional regulator EspR	Mycobacterium avium subsp. paratuberculosis K-10	ESX-1 (VF0315) - Effector delivery system (VFC0086)	1	1	1	1	1	1	1	1	1	1	1	1	1	1	1	1	1	1	1	1	1	1	1
VFG021845(gb|WP_003874876)	mbtK	Lysine N-acetyltransferase MbtK	Mycobacterium avium subsp. paratuberculosis K-10	Mycobactin (VF0299) - Nutritional/Metabolic factor (VFC0272)	1	1	1	1	1	1	1	1	1	1	1	1	1	1	1	1	1	1	1	1	1	1	1
VFG021832(gb|WP_003877913)	mbtN	Acyl-CoA dehydrogenase MbtN	Mycobacterium avium subsp. paratuberculosis K-10	Mycobactin (VF0299) - Nutritional/Metabolic factor (VFC0272)	1	1	1	1	1	1	1	1	1	1	1	1	1	1	1	1	1	1	1	1	1	1	1
VFG021818(gb|WP_003877914)	mbtM	Probable fatty acyl-AMP ligase MbtM	Mycobacterium avium subsp. paratuberculosis K-10	Mycobactin (VF0299) - Nutritional/Metabolic factor (VFC0272)	1	1	1	1	1	1	1	1	1	1	1	1	1	1	1	1	1	1	1	1	1	1	1
VFG021805(gb|WP_019306489)	mbtL	Acyl carrier protein (ACP	Mycobacterium avium subsp. paratuberculosis K-10	Mycobactin (VF0299) - Nutritional/Metabolic factor (VFC0272)	1	1	1	1	1	1	1	1	1	1	1	1	1	1	1	1	1	1	1	1	1	1	1
VFG017616(gb|WP_003874404)	esxM	WXG100 family type VII secretion target	Mycobacterium avium subsp. paratuberculosis K-10	ESX-5 (VF0402) - Effector delivery system (VFC0086)	1	1	1	1	1	1	1	1	1	1	1	1	1	1	1	1	1	1	1	1	1	1	1
VFG017485	nuoG	- Immune modulation (VFC0258)]	Mycobacterium avium subsp. paratuberculosis K-10	NuoG (VF0833) - Immune modulation (VFC0258)	1	0	1	0	0	0	1	0	0	0	0	0	1	0	0	0	0	0	0	0	0	0	1
VFG010435(gb|WP_010948739)	mce9F	MlaD family protein	Mycobacterium avium subsp. paratuberculosis K-10	Mce9 (VF0832) - Others (VFC0346)	1	1	1	1	1	1	1	1	1	1	1	1	1	1	1	1	1	1	1	1	1	1	1
VFG010433(gb|WP_003876029)	mce9E	MCE family protein	Mycobacterium avium subsp. paratuberculosis K-10	Mce9 (VF0832) - Others (VFC0346)	1	1	1	1	1	1	1	1	1	1	1	1	1	1	1	1	1	1	1	1	1	1	1
VFG010431(gb|WP_003876028)	mce9D	MCE family protein	Mycobacterium avium subsp. paratuberculosis K-10	Mce9 (VF0832) - Others (VFC0346)	1	1	1	1	1	1	1	1	1	1	1	1	1	1	1	1	1	1	1	1	1	1	1
VFG010429(gb|WP_003876027)	mce9C	MCE family protein	Mycobacterium avium subsp. paratuberculosis K-10	Mce9 (VF0832) - Others (VFC0346)	1	1	1	1	1	1	1	1	1	1	1	1	1	1	1	1	1	1	1	1	1	1	1
VFG010427(gb|WP_003876026)	mce9B	MCE family protein	Mycobacterium avium subsp. paratuberculosis K-10	Mce9 (VF0832) - Others (VFC0346)	1	1	1	1	1	1	1	1	1	1	1	1	1	1	1	1	1	1	1	1	1	1	1
VFG010425(gb|WP_015632714)	mce9A	MCE family protein	Mycobacterium avium subsp. paratuberculosis K-10	Mce9 (VF0832) - Others (VFC0346)	1	1	1	1	1	1	1	1	1	1	1	1	1	1	1	1	1	1	1	1	1	1	1
VFG010419(gb|WP_010949511)	mce8F	MCE family protein	Mycobacterium avium subsp. paratuberculosis K-10	Mce8 (VF0831) - Others (VFC0346)	1	1	1	1	1	1	1	1	1	1	1	1	1	1	1	1	1	1	1	1	1	1	1
VFG010412	mce8E	- Others (VFC0346)]	Mycobacterium avium subsp. paratuberculosis K-10	Mce8 (VF0831) - Others (VFC0346)	1	1	1	1	1	1	1	1	1	1	1	1	1	1	1	1	1	1	1	1	1	1	1
VFG010405(gb|WP_003875939)	mce8D	MCE family protein	Mycobacterium avium subsp. paratuberculosis K-10	Mce8 (VF0831) - Others (VFC0346)	1	1	1	1	1	1	1	1	1	1	1	1	1	1	1	1	1	1	1	1	1	1	1
VFG010398(gb|WP_003878359)	mce8C	MCE family protein	Mycobacterium avium subsp. paratuberculosis K-10	Mce8 (VF0831) - Others (VFC0346)	0	1	1	1	1	1	1	1	1	1	0	1	1	1	1	1	1	1	1	1	1	1	1
VFG010391(gb|WP_003875941)	mce8B	MCE family protein	Mycobacterium avium subsp. paratuberculosis K-10	Mce8 (VF0831) - Others (VFC0346)	1	1	1	1	1	1	1	1	1	1	1	1	1	1	1	1	1	1	1	1	1	1	1
VFG010384(gb|WP_003875942)	mce8A	MCE family protein	Mycobacterium avium subsp. paratuberculosis K-10	Mce8 (VF0831) - Others (VFC0346)	1	1	1	1	1	1	1	1	1	1	1	1	1	1	1	1	1	1	1	1	1	1	1
VFG010375(gb|WP_003872967)	mce7F	MCE family protein	Mycobacterium avium subsp. paratuberculosis K-10	Mce7 (VF0830) - Others (VFC0346)	1	1	1	1	1	1	1	1	1	1	1	1	1	1	1	1	1	1	1	1	1	1	1
VFG010367(gb|WP_003872968)	mce7E	MCE family protein	Mycobacterium avium subsp. paratuberculosis K-10	Mce7 (VF0830) - Others (VFC0346)	1	1	1	1	1	1	1	1	1	1	1	1	1	1	1	1	1	1	1	1	1	1	1
VFG010358	mce7D	- Others (VFC0346)]	Mycobacterium avium subsp. paratuberculosis K-10	Mce7 (VF0830) - Others (VFC0346)	1	1	1	1	1	1	1	1	1	1	1	1	1	1	1	1	1	1	1	1	1	1	1
VFG010349(gb|WP_003872970)	mce7C	MCE family protein	Mycobacterium avium subsp. paratuberculosis K-10	Mce7 (VF0830) - Others (VFC0346)	0	1	1	1	1	1	1	1	1	1	0	1	1	1	1	1	1	1	1	1	1	1	1
VFG010340(gb|WP_010948961)	mce7B	MCE family protein	Mycobacterium avium subsp. paratuberculosis K-10	Mce7 (VF0830) - Others (VFC0346)	1	1	1	1	1	1	1	1	1	1	1	1	1	1	1	1	1	1	1	1	1	1	1
VFG010331(gb|WP_003872972)	mce7A	MCE family protein	Mycobacterium avium subsp. paratuberculosis K-10	Mce7 (VF0830) - Others (VFC0346)	1	1	1	1	1	1	1	1	1	1	1	1	1	1	1	1	1	1	1	1	1	1	1
VFG010319(gb|WP_010949380)	mce5F	MlaD family protein	Mycobacterium avium subsp. paratuberculosis K-10	Mce5 (VF0828) - Others (VFC0346)	1	1	1	1	1	1	1	1	1	1	1	1	1	1	1	1	1	1	1	1	1	1	1
VFG010313(gb|WP_003872182)	mce5E	MlaD family protein	Mycobacterium avium subsp. paratuberculosis K-10	Mce5 (VF0828) - Others (VFC0346)	1	1	1	1	1	1	1	1	1	1	1	1	1	1	1	1	1	1	1	1	1	1	1
VFG010308(gb|WP_010949379)	mce5D	MCE family protein	Mycobacterium avium subsp. paratuberculosis K-10	Mce5 (VF0828) - Others (VFC0346)	1	1	1	1	1	1	1	1	1	1	1	1	1	1	1	1	1	1	1	1	1	1	1
VFG010302(gb|WP_029245094)	mce5C	MCE family protein	Mycobacterium avium subsp. paratuberculosis K-10	Mce5 (VF0828) - Others (VFC0346)	1	1	1	1	1	1	1	1	1	1	1	1	1	1	1	1	1	1	1	1	1	1	1
VFG010296(gb|WP_003872179)	mce5B	MCE family protein	Mycobacterium avium subsp. paratuberculosis K-10	Mce5 (VF0828) - Others (VFC0346)	1	1	1	1	1	1	1	1	1	1	1	1	1	1	1	1	1	1	1	1	1	1	1
VFG010290(gb|WP_003872178)	mce5A	MCE family protein	Mycobacterium avium subsp. paratuberculosis K-10	Mce5 (VF0828) - Others (VFC0346)	1	1	1	1	1	1	1	1	1	1	1	1	1	1	1	1	1	1	1	1	1	1	1
VFG010282(gb|WP_003877162)	mce4F	virulence factor Mce family protein	Mycobacterium avium subsp. paratuberculosis K-10	Mce4 (VF0827) - Immune modulation (VFC0258)	1	1	1	1	1	1	1	1	1	1	1	1	1	0	1	1	1	1	1	1	1	1	1
VFG010268(gb|WP_009974841)	mce4E	MCE family protein	Mycobacterium avium subsp. paratuberculosis K-10	Mce4 (VF0827) - Immune modulation (VFC0258)	0	1	0	0	0	0	1	0	0	0	0	1	1	0	1	1	1	1	1	1	1	1	1
VFG010254(gb|WP_010948893)	mce4D	virulence factor Mce family protein	Mycobacterium avium subsp. paratuberculosis K-10	Mce4 (VF0827) - Immune modulation (VFC0258)	1	1	1	1	1	1	1	1	1	1	1	1	1	1	1	1	1	1	1	1	1	1	1
VFG010240(gb|WP_170924195)	mce4C	virulence factor Mce family protein	Mycobacterium avium subsp. paratuberculosis K-10	Mce4 (VF0827) - Immune modulation (VFC0258)	1	1	1	1	1	1	1	1	1	1	1	1	1	1	1	1	1	1	1	1	1	1	1
VFG010226(gb|WP_010948892)	mce4B	virulence factor Mce family protein	Mycobacterium avium subsp. paratuberculosis K-10	Mce4 (VF0827) - Immune modulation (VFC0258)	1	1	1	1	1	1	1	1	1	1	1	1	1	1	1	1	1	1	1	1	1	1	1
VFG010212(gb|WP_003875720)	mce4A	virulence factor Mce family protein	Mycobacterium avium subsp. paratuberculosis K-10	Mce4 (VF0827) - Immune modulation (VFC0258)	1	1	1	1	1	1	1	1	1	1	1	1	1	1	1	1	1	1	1	1	1	1	1
VFG010187(gb|WP_003872483)	mce3F	MCE family protein	Mycobacterium avium subsp. paratuberculosis K-10	Mce3 (VF0826) - Immune modulation (VFC0258)	1	1	1	1	1	1	1	1	1	1	1	1	1	1	1	1	1	1	1	1	1	1	1
VFG010164(gb|WP_010949482)	mce3E	MCE family protein	Mycobacterium avium subsp. paratuberculosis K-10	Mce3 (VF0826) - Immune modulation (VFC0258)	1	0	0	0	0	0	0	0	0	0	0	1	1	0	0	1	1	1	1	1	1	1	1
VFG010141(gb|WP_003872485)	mce3D	MCE family protein	Mycobacterium avium subsp. paratuberculosis K-10	Mce3 (VF0826) - Immune modulation (VFC0258)	1	1	1	1	1	1	1	1	1	1	1	1	1	1	1	1	1	1	1	1	1	1	1
VFG010118(gb|WP_010949483)	mce3C	MCE family protein	Mycobacterium avium subsp. paratuberculosis K-10	Mce3 (VF0826) - Immune modulation (VFC0258)	1	1	1	1	1	1	1	1	1	1	1	1	1	1	1	1	1	1	1	1	1	1	1
VFG010096(gb|WP_010949484)	mce3B	MCE family protein	Mycobacterium avium subsp. paratuberculosis K-10	Mce3 (VF0826) - Immune modulation (VFC0258)	0	0	1	1	0	0	1	0	0	0	0	1	1	0	1	1	1	1	1	1	1	1	1
VFG010073(gb|WP_003878304)	mce3A	MCE family protein	Mycobacterium avium subsp. paratuberculosis K-10	Mce3 (VF0826) - Immune modulation (VFC0258)	1	1	1	1	1	1	1	1	1	1	1	1	1	1	1	1	1	1	1	1	1	1	1
VFG010063(gb|WP_003879393)	mce2F	MCE family protein	Mycobacterium avium subsp. paratuberculosis K-10	Mce2 (VF0825) - Immune modulation (VFC0258)	1	1	1	1	1	1	1	1	1	1	1	1	1	1	1	1	1	1	1	1	1	1	1
VFG010051(gb|WP_010950232)	mce2E	virulence factor Mce family protein	Mycobacterium avium subsp. paratuberculosis K-10	Mce2 (VF0825) - Immune modulation (VFC0258)	1	1	1	1	1	0	1	1	1	1	1	1	1	1	1	1	1	1	1	1	1	1	1
VFG010039(gb|WP_010950231)	mce2D	virulence factor Mce family protein	Mycobacterium avium subsp. paratuberculosis K-10	Mce2 (VF0825) - Immune modulation (VFC0258)	1	1	1	1	1	1	1	1	1	1	1	1	1	1	1	1	1	1	1	1	1	1	1
VFG010027(gb|WP_015632739)	mce2C	virulence factor Mce family protein	Mycobacterium avium subsp. paratuberculosis K-10	Mce2 (VF0825) - Immune modulation (VFC0258)	1	1	1	1	1	1	1	1	1	1	0	1	1	1	1	1	1	1	1	1	1	1	1
VFG010015(gb|WP_003873596)	mce2B	MCE family protein	Mycobacterium avium subsp. paratuberculosis K-10	Mce2 (VF0825) - Immune modulation (VFC0258)	1	1	1	1	1	1	1	1	1	1	1	1	1	1	1	1	1	1	1	1	1	1	1
VFG010002	mce2A	- Immune modulation (VFC0258)]	Mycobacterium avium subsp. paratuberculosis K-10	Mce2 (VF0825) - Immune modulation (VFC0258)	1	1	1	1	1	1	1	1	1	1	1	1	1	1	1	1	1	1	1	1	1	1	1
VFG009992(gb|WP_003874126)	mce1F	MCE family protein	Mycobacterium avium subsp. paratuberculosis K-10	Mce1 (VF0824) - Nutritional/Metabolic factor (VFC0272)	1	1	1	1	1	1	1	1	1	1	1	1	1	1	1	1	1	1	1	1	1	1	1
VFG009982(gb|WP_003879093)	mce1E	virulence factor Mce family protein	Mycobacterium avium subsp. paratuberculosis K-10	Mce1 (VF0824) - Nutritional/Metabolic factor (VFC0272)	1	1	1	1	1	0	1	1	1	1	1	1	1	1	1	1	1	1	1	1	1	1	1
VFG009972(gb|WP_003879092)	mce1D	virulence factor Mce family protein	Mycobacterium avium subsp. paratuberculosis K-10	Mce1 (VF0824) - Nutritional/Metabolic factor (VFC0272)	1	1	1	1	1	1	1	1	1	1	1	1	1	1	1	1	1	1	1	1	1	1	1
VFG009962(gb|WP_010950035)	mce1C	MCE family protein	Mycobacterium avium subsp. paratuberculosis K-10	Mce1 (VF0824) - Nutritional/Metabolic factor (VFC0272)	1	1	1	1	1	1	1	1	1	1	0	1	1	1	1	1	1	1	1	0	1	1	1
VFG009952(gb|WP_003874130)	mce1B	virulence factor Mce family protein	Mycobacterium avium subsp. paratuberculosis K-10	Mce1 (VF0824) - Nutritional/Metabolic factor (VFC0272)	1	1	1	1	1	1	1	1	1	1	1	1	1	1	1	1	1	1	1	1	1	1	1
VFG009940(gb|WP_003878884)	mce1A	MCE family protein	Mycobacterium avium subsp. paratuberculosis K-10	Mce1 (VF0824) - Nutritional/Metabolic factor (VFC0272)	0	0	1	0	1	0	1	0	0	1	0	1	0	1	1	1	1	0	1	1	1	1	1
VFG009924(gb|WP_003877578)	relA	Probable GTP pyrophosphokinase RelA (ATP:GTP 3'-pyrophosphotransferase	Mycobacterium avium subsp. paratuberculosis K-10	RelA (VF0287) - Regulation (VFC0301)	1	1	1	1	1	1	1	1	1	1	1	1	1	1	1	1	1	1	1	1	1	1	1
VFG009907(gb|WP_003878870)	devS	GAF domain-containing sensor histidine kinase	Mycobacterium avium subsp. paratuberculosis K-10	DevRS (VF0317) - Regulation (VFC0301)	1	1	1	1	1	1	1	1	1	1	1	1	1	1	1	1	1	1	1	1	1	1	1
VFG009889(gb|WP_003874670)	devR/dosR	response regulator transcription factor	Mycobacterium avium subsp. paratuberculosis K-10	DevRS (VF0317) - Regulation (VFC0301)	1	1	1	1	1	1	1	1	1	1	1	1	1	1	1	1	1	1	1	1	1	1	1
VFG009874(gb|WP_003877497)	mprB	HAMP domain-containing histidine kinase	Mycobacterium avium subsp. paratuberculosis K-10	MprAB (VF0298) - Regulation (VFC0301)	1	1	1	1	1	1	1	1	1	1	1	1	1	1	1	1	1	1	1	1	1	1	1
VFG009859(gb|WP_003872811)	mprA	two-component system response regulator MprA	Mycobacterium avium subsp. paratuberculosis K-10	MprAB (VF0298) - Regulation (VFC0301)	1	1	1	1	1	1	1	1	1	1	1	1	1	1	1	1	1	1	1	1	1	1	1
VFG009844	prrB	- Regulation (VFC0301)]	Mycobacterium avium subsp. paratuberculosis K-10	PrrA/B (VF0823) - Regulation (VFC0301)	1	1	1	1	1	1	1	1	1	1	1	1	1	1	1	1	1	1	1	1	1	1	1
VFG009829(gb|WP_024637144)	prrA	two-component system response regulator PrrA	Mycobacterium avium subsp. paratuberculosis K-10	PrrA/B (VF0823) - Regulation (VFC0301)	1	1	1	1	1	1	1	1	1	1	1	1	1	1	1	1	1	1	1	1	1	1	1
VFG009815(gb|WP_162830471)	phoR	Possible two component system response sensor kinase membrane associated PhoR	Mycobacterium avium subsp. paratuberculosis K-10	PhoP (VF0286) - Regulation (VFC0301)	0	1	1	0	0	1	1	0	1	1	0	1	1	1	1	1	1	1	1	1	1	1	1
VFG009801(gb|WP_010948903)	phoP	Possible two component system response transcriptional positive regulator PhoP	Mycobacterium avium subsp. paratuberculosis K-10	PhoP (VF0286) - Regulation (VFC0301)	1	1	1	1	1	1	1	1	1	1	1	1	1	1	1	1	1	1	1	1	1	1	1
VFG009786(gb|WP_003874400)	whiB3	WhiB family transcriptional regulator	Mycobacterium avium subsp. paratuberculosis K-10	WhiB3 (VF0288) - Regulation (VFC0301)	1	1	1	1	1	1	1	1	1	1	1	1	1	1	1	1	1	1	1	1	1	1	1
VFG009772(gb|WP_003874356)	sigM	RNA polymerase sigma factor SigM	Mycobacterium avium subsp. paratuberculosis K-10	Sigma M (VF0822) - Regulation (VFC0301)	1	1	1	1	1	1	1	1	1	1	1	1	1	1	1	1	1	1	1	1	1	1	1
VFG009758(gb|WP_003878913)	sigH	sigma-70 family RNA polymerase sigma factor	Mycobacterium avium subsp. paratuberculosis K-10	SigH (VF0296) - Regulation (VFC0301)	1	1	1	1	1	1	1	1	1	1	1	1	1	1	1	1	1	1	1	1	1	1	1
VFG009743(gb|WP_003875522)	sigE	RNA polymerase sigma factor SigE	Mycobacterium avium subsp. paratuberculosis K-10	SigE (VF0295) - Regulation (VFC0301)	1	1	1	1	1	1	1	1	1	1	1	1	1	1	1	1	1	1	1	1	1	1	1
VFG009729(gb|WP_003878969)	sigF	RNA polymerase sigma factor SigF	Mycobacterium avium subsp. paratuberculosis K-10	SigF (VF0294) - Regulation (VFC0301)	1	1	1	1	1	1	1	1	1	1	1	1	1	1	1	1	1	1	1	1	1	1	1
VFG009714(gb|WP_010949738)	sigA/rpoV	RNA polymerase sigma factor	Mycobacterium avium subsp. paratuberculosis K-10	SigA (VF0257) - Regulation (VFC0301)	1	1	1	1	1	1	1	1	1	1	1	1	1	1	1	1	1	1	1	1	1	1	1
VFG009701(gb|WP_010948769)	sodA	superoxide dismutase	Mycobacterium avium subsp. paratuberculosis K-10	SodA (VF0304) - Stress survival (VFC0282)	1	1	1	1	1	1	1	1	1	1	1	1	1	1	1	1	1	1	1	1	1	1	1
VFG009676(gb|WP_003876555)	ahpC	peroxiredoxin	Mycobacterium avium subsp. paratuberculosis K-10	AhpC (VF0306) - Stress survival (VFC0282)	1	1	1	1	1	1	1	1	1	1	1	1	1	1	1	1	1	1	1	1	1	1	1
VFG009661(gb|WP_003877970)	katG	catalase/peroxidase HPI	Mycobacterium avium subsp. paratuberculosis K-10	KatG (VF0303) - Stress survival (VFC0282)	0	0	1	0	1	1	1	0	0	0	0	0	1	0	1	1	1	1	1	1	1	1	1
VFG009632(gb|WP_003875458)	narI	respiratory nitrate reductase subunit gamma	Mycobacterium avium subsp. paratuberculosis K-10	Nitrate reductase (VF0302) - Nutritional/Metabolic factor (VFC0272)	1	1	1	1	1	1	1	1	1	1	1	1	1	1	1	1	1	1	1	1	1	1	1
VFG009619(gb|WP_019305597)	narJ	nitrate reductase molybdenum cofactor assembly chaperone	Mycobacterium avium subsp. paratuberculosis K-10	Nitrate reductase (VF0302) - Nutritional/Metabolic factor (VFC0272)	1	1	1	1	1	1	1	1	1	1	1	1	1	1	1	1	1	1	1	1	1	1	1
VFG009606(gb|WP_003875456)	narH	nitrate reductase subunit beta	Mycobacterium avium subsp. paratuberculosis K-10	Nitrate reductase (VF0302) - Nutritional/Metabolic factor (VFC0272)	1	1	1	1	1	1	1	1	1	1	1	1	1	1	1	1	1	1	1	1	1	1	1
VFG009593(gb|WP_010949671)	narG	nitrate reductase subunit alpha	Mycobacterium avium subsp. paratuberculosis K-10	Nitrate reductase (VF0302) - Nutritional/Metabolic factor (VFC0272)	1	1	1	1	1	1	1	1	1	1	1	1	1	1	1	1	1	1	1	1	1	1	1
VFG009584(gb|WP_003873185)	irtB	Iron-regulated transporter IrtB	Mycobacterium avium subsp. paratuberculosis K-10	ABC transporter (VF0818) - Nutritional/Metabolic factor (VFC0272)	1	1	1	1	0	1	1	0	0	0	0	1	1	1	0	0	0	0	0	0	0	0	1
VFG009575(gb|WP_003873186)	irtA	Iron-regulated transporter IrtA	Mycobacterium avium subsp. paratuberculosis K-10	ABC transporter (VF0818) - Nutritional/Metabolic factor (VFC0272)	1	1	1	1	1	1	1	1	1	1	1	1	1	1	1	1	1	1	1	0	1	1	1
VFG009566(gb|WP_003875926)	mbtI	Isochorismate synthase MbtI	Mycobacterium avium subsp. paratuberculosis K-10	Mycobactin (VF0299) - Nutritional/Metabolic factor (VFC0272)	1	1	1	1	1	1	1	1	1	1	1	1	1	1	1	1	1	1	1	1	1	1	1
VFG009558(gb|WP_010949514)	mbtJ	Putative acetyl hydrolase MbtJ	Mycobacterium avium subsp. paratuberculosis K-10	Mycobactin (VF0299) - Nutritional/Metabolic factor (VFC0272)	1	1	1	1	1	1	1	1	1	1	1	1	1	1	1	1	1	1	1	1	1	1	1
VFG009544	mbtA	+ salicyl-S-ArCP synthetase	Mycobacterium avium subsp. paratuberculosis K-10	Mycobactin (VF0299) - Nutritional/Metabolic factor (VFC0272)	1	1	1	1	1	1	1	1	1	1	1	1	1	1	1	1	1	1	1	1	1	1	1
VFG009530(gb|WP_010949506)	mbtB	Phenyloxazoline synthase MbtB (phenyloxazoline synthetase	Mycobacterium avium subsp. paratuberculosis K-10	Mycobactin (VF0299) - Nutritional/Metabolic factor (VFC0272)	1	0	1	1	0	0	1	0	0	1	0	0	1	0	0	0	0	0	0	0	1	1	1
VFG009516(gb|WP_033706523)	mbtC	Polyketide synthetase MbtC (polyketide synthase	Mycobacterium avium subsp. paratuberculosis K-10	Mycobactin (VF0299) - Nutritional/Metabolic factor (VFC0272)	1	1	1	1	1	1	1	1	1	1	1	1	1	1	1	1	1	1	1	1	1	1	1
VFG009502(gb|WP_003878343)	mbtD	Polyketide synthetase MbtD (polyketide synthase	Mycobacterium avium subsp. paratuberculosis K-10	Mycobactin (VF0299) - Nutritional/Metabolic factor (VFC0272)	1	1	1	1	1	1	1	1	1	1	1	1	1	1	1	1	1	1	1	0	1	1	1
VFG009488	mbtE	[Mycobactin (VF0299	Mycobacterium avium subsp. paratuberculosis K-10	Mycobactin (VF0299) - Nutritional/Metabolic factor (VFC0272)	1	1	1	1	1	1	1	1	1	1	1	1	1	1	1	1	1	1	0	0	1	1	1
VFG009474	mbtF	[Mycobactin (VF0299	Mycobacterium avium subsp. paratuberculosis K-10	Mycobactin (VF0299) - Nutritional/Metabolic factor (VFC0272)	1	1	1	1	1	0	1	0	1	1	0	1	0	1	1	1	1	1	1	1	1	1	1
VFG009460(gb|WP_003878341)	mbtG	Lysine-N-oxygenase MbtG (L-lysine 6-monooxygenase	Mycobacterium avium subsp. paratuberculosis K-10	Mycobactin (VF0299) - Nutritional/Metabolic factor (VFC0272)	1	1	1	1	1	1	1	1	1	1	1	1	1	1	1	1	1	1	1	1	1	1	1
VFG009446(gb|WP_003875997)	mbtH	putative protein MbtH	Mycobacterium avium subsp. paratuberculosis K-10	Mycobactin (VF0299) - Nutritional/Metabolic factor (VFC0272)	1	1	1	1	1	1	1	1	1	1	1	1	1	1	1	1	1	1	1	1	1	1	1
VFG009431(gb|WP_003878619)	ideR	Iron-dependent repressor and activator IdeR	Mycobacterium avium subsp. paratuberculosis K-10	IdeR (VF0300) - Regulation (VFC0301)	1	1	1	1	1	1	1	1	1	1	1	1	1	1	1	1	1	1	1	1	1	1	1
VFG009420(gb|WP_003876491)	mgtC	Possible Mg2+ transport P-type ATPase C MgtC	Mycobacterium avium subsp. paratuberculosis K-10	MgtC (VF0289) - Nutritional/Metabolic factor (VFC0272)	1	1	1	1	1	1	1	1	1	1	0	1	1	1	1	1	1	1	1	1	1	1	1
VFG009402(gb|WP_003872332)	glnA1	type I glutamate--ammonia ligase	Mycobacterium avium subsp. paratuberculosis K-10	Glutamine synthesis (VF0816) - Nutritional/Metabolic factor (VFC0272)	1	1	1	1	1	1	1	1	1	1	1	1	1	1	1	1	1	1	1	1	1	1	1
VFG009387(gb|WP_003877287)	lysA	diaminopimelate decarboxylase	Mycobacterium avium subsp. paratuberculosis K-10	Lysine synthesis (VF0815) - Nutritional/Metabolic factor (VFC0272)	1	1	1	1	1	1	1	1	1	1	1	1	1	1	1	1	1	1	1	1	1	1	1
VFG009372(gb|WP_003875017)	leuD	3-isopropylmalate dehydratase small subunit	Mycobacterium avium subsp. paratuberculosis K-10	Leucine synthesis (VF0814) - Nutritional/Metabolic factor (VFC0272)	1	1	1	1	1	1	1	1	1	1	1	1	1	1	1	1	1	1	1	1	1	1	1
VFG009357	trpD	- Nutritional/Metabolic factor (VFC0272)]	Mycobacterium avium subsp. paratuberculosis K-10	Tryptophan synthesis (VF0813) - Nutritional/Metabolic factor (VFC0272)	1	1	1	1	1	1	1	1	1	1	1	1	1	1	1	1	1	1	1	1	1	1	1
VFG009342(gb|WP_172799599)	proC	pyrroline-5-carboxylate reductase	Mycobacterium avium subsp. paratuberculosis K-10	Proline synthesis (VF0812) - Nutritional/Metabolic factor (VFC0272)	1	1	1	1	1	1	1	1	1	1	1	1	1	1	1	1	1	1	1	1	1	1	1
VFG009262(gb|WP_010950181)	icl	Isocitrate lyase Icl (isocitrase	Mycobacterium avium subsp. paratuberculosis K-10	Isocitrate lyase (VF0253) - Others (VFC0346)	1	1	1	1	1	1	1	1	1	1	1	1	1	1	1	1	1	1	1	1	1	1	1
VFG009254(gb|WP_170936881)	sapM	acid phosphatase	Mycobacterium avium subsp. paratuberculosis K-10	Lipid phosphatase (VF0810) - Immune modulation (VFC0258)	1	1	1	1	1	1	1	1	1	1	1	1	1	1	1	1	1	1	1	1	1	1	1
VFG009205(gb|WP_003877892)	mycP5	ESX-5 type VII secretion system subtilisin-like serine protease MycP5	Mycobacterium avium subsp. paratuberculosis K-10	ESX-5 (VF0402) - Effector delivery system (VFC0086)	0	0	0	0	0	0	0	0	0	0	0	0	0	0	0	0	0	0	0	0	0	0	1
VFG009195(gb|WP_003877893)	eccE5	ESX-5 type VII secretion system EccE5	Mycobacterium avium subsp. paratuberculosis K-10	ESX-5 (VF0402) - Effector delivery system (VFC0086)	1	1	1	1	1	1	1	1	1	1	1	1	1	1	1	1	1	1	1	1	1	1	1
VFG009185(gb|WP_003877894)	eccA5	ESX-5 type VII secretion system AAA+ ATPase EccA5	Mycobacterium avium subsp. paratuberculosis K-10	ESX-5 (VF0402) - Effector delivery system (VFC0086)	1	1	1	1	1	1	1	1	1	1	1	1	1	1	1	1	1	1	1	1	1	1	1
VFG009102(gb|WP_003877890)	Rv1794	ESX-5 locus protein	Mycobacterium avium subsp. paratuberculosis K-10	ESX-5 (VF0402) - Effector delivery system (VFC0086)	1	1	1	1	1	1	1	1	1	1	0	1	1	1	1	1	1	1	1	1	1	1	1
VFG009092(gb|WP_010949246)	eccD5	ESX-5 type VII secretion system EccD5	Mycobacterium avium subsp. paratuberculosis K-10	ESX-5 (VF0402) - Effector delivery system (VFC0086)	1	1	1	1	1	1	1	1	1	1	1	1	1	1	1	1	1	1	1	1	1	1	1
VFG008348(gb|WP_003877884)	eccC5	ESX-5 type VII secretion system FtsK/SpoIIIE family protein EccC5	Mycobacterium avium subsp. paratuberculosis K-10	ESX-5 (VF0402) - Effector delivery system (VFC0086)	1	1	1	1	1	1	1	1	0	0	0	1	1	1	1	1	1	1	1	1	1	1	1
VFG008327(gb|WP_003877883)	eccB5	ESX-5 type VII secretion system protein EccB5	Mycobacterium avium subsp. paratuberculosis K-10	ESX-5 (VF0402) - Effector delivery system (VFC0086)	0	0	1	1	1	1	1	1	1	1	0	1	1	1	1	1	1	1	1	1	1	1	1
VFG008248(gb|WP_003873405)	lpqH	lipoprotein LpqH	Mycobacterium avium subsp. paratuberculosis K-10	19-kD protein (VF0806) - Immune modulation (VFC0258)	1	1	1	1	1	1	1	1	1	1	1	1	1	1	1	1	1	1	1	1	1	1	1
VFG008233(gb|WP_010950156)	pknG	serine/threonine-protein kinase PknG	Mycobacterium avium subsp. paratuberculosis K-10	Protein kinase G (VF0805) - Immune modulation (VFC0258)	0	1	1	1	1	0	1	0	0	0	0	1	1	0	1	1	1	1	1	1	1	1	1
VFG008169(gb|WP_003874240)	fbpC	Secreted antigen 85-C FbpC (85C	Mycobacterium avium subsp. paratuberculosis K-10	Antigen 85 (VF0311) - Adherence (VFC0001)	1	1	1	1	1	1	1	1	1	1	1	1	1	1	1	1	1	1	1	1	1	1	1
VFG008159(gb|WP_010949276)	fbpB	Secreted antigen 85-B FbpB (85B	Mycobacterium avium subsp. paratuberculosis K-10	Antigen 85 (VF0311) - Adherence (VFC0001)	1	1	1	1	1	1	1	1	1	1	1	1	1	1	1	1	1	1	1	1	1	1	1
VFG008149(gb|WP_003872573)	fbpA	Secreted antigen 85-a FbpA (mycolyl transferase 85A	Mycobacterium avium subsp. paratuberculosis K-10	Antigen 85 (VF0311) - Adherence (VFC0001)	1	1	1	1	1	1	1	1	1	1	1	1	1	1	1	1	1	1	1	1	1	1	1
VFG008013(gb|WP_003873099)	eis	acetyltransferase	Mycobacterium avium subsp. paratuberculosis K-10	Enhanced intracellular survival protein (VF0807) - Antimicrobial activity/Competitive advantage (VFC0325)	1	1	1	1	1	1	1	1	1	1	1	1	1	1	1	1	1	1	1	1	1	1	1
VFG008012(gb|WP_040963265)	pks2	type I polyketide synthase	Mycobacterium avium subsp. paratuberculosis K-10	Sulfolipid-1 biosynthesis and transport (VF0803) - Immune modulation (VFC0258)	0	1	1	0	1	1	1	1	1	1	1	1	1	1	1	1	1	1	1	1	1	1	1
VFG007996(gb|WP_010949317)	papA2	condensation domain-containing protein	Mycobacterium avium subsp. paratuberculosis K-10	Sulfolipid-1 biosynthesis and transport (VF0803) - Immune modulation (VFC0258)	1	1	1	1	1	1	1	1	1	1	1	1	1	1	1	1	1	1	1	0	1	1	1
VFG007985(gb|WP_003872491)	stf0	Stf0 sulfotransferase family protein	Mycobacterium avium subsp. paratuberculosis K-10	Sulfolipid-1 biosynthesis and transport (VF0803) - Immune modulation (VFC0258)	1	1	1	1	1	1	1	1	1	1	1	1	1	1	1	1	1	1	1	1	1	1	1
VFG007951(gb|WP_003876142)	MAP_RS06265	glycosyltransferase	Mycobacterium avium subsp. paratuberculosis K-10	PDIM (VF0309) - Immune modulation (VFC0258)	1	1	1	1	1	1	1	1	1	1	1	1	1	1	1	1	1	1	1	1	1	1	1
VFG007937(gb|WP_010949127)	drrC	ABC transporter permease	Mycobacterium avium subsp. paratuberculosis K-10	PDIM (VF0309) - Immune modulation (VFC0258)	1	1	1	1	1	1	1	1	1	1	1	1	1	1	1	1	1	1	1	1	1	1	1
VFG007923(gb|WP_003876145)	ddrB	ABC transporter permease	Mycobacterium avium subsp. paratuberculosis K-10	PDIM (VF0309) - Immune modulation (VFC0258)	1	1	1	1	1	1	1	1	1	1	1	1	1	1	1	1	1	1	1	1	1	1	1
VFG007909(gb|WP_003876146)	ddrA	daunorubicin resistance protein DrrA family ABC transporter ATP-binding protein	Mycobacterium avium subsp. paratuberculosis K-10	PDIM (VF0309) - Immune modulation (VFC0258)	0	1	1	0	1	1	1	1	1	1	1	1	1	1	1	1	1	1	1	1	1	1	1
VFG007785(gb|WP_010950094)	fadD28	AMP-binding protein	Mycobacterium avium subsp. paratuberculosis K-10	PDIM (VF0309) - Immune modulation (VFC0258)	1	1	1	1	1	1	1	1	1	1	1	1	1	1	1	1	1	1	1	1	1	1	1
VFG007759(gb|WP_003873565)	mmaA4	class I SAM-dependent methyltransferase	Mycobacterium avium subsp. paratuberculosis K-10	MmaA4 (VF0314) - Others (VFC0346)	1	1	1	1	1	1	1	1	1	1	1	1	1	1	1	1	1	1	1	1	1	1	1
VFG007749(gb|WP_010950197)	cmaA2	class I SAM-dependent methyltransferase	Mycobacterium avium subsp. paratuberculosis K-10	Mycolic acid trans-cyclopropane synthetase (VF0802) - Others (VFC0346)	1	1	1	1	1	1	1	1	1	1	1	1	1	1	1	1	1	1	1	1	1	1	1
VFG007735(gb|WP_010950183)	pcaA	class I SAM-dependent methyltransferase	Mycobacterium avium subsp. paratuberculosis K-10	PcaA (VF0285) - Others (VFC0346)	1	1	1	1	1	1	1	1	1	1	1	1	1	1	1	1	1	1	1	1	1	1	1
VFG007720(gb|WP_003879302)	hbhA	iron-regulated heparin binding hemagglutinin hbhA (adhesin	Mycobacterium avium subsp. paratuberculosis K-10	HbhA (VF0313) - Adherence (VFC0001)	1	1	1	0	1	1	1	1	1	1	0	1	1	1	1	1	1	1	1	1	1	1	1
VFG007705(gb|WP_010948778)	erp	exported repetitive protein precursor Erp	Mycobacterium avium subsp. paratuberculosis K-10	Erp (VF0312) - Others (VFC0346)	0	0	0	0	0	0	0	0	0	0	0	0	0	0	0	1	0	0	0	0	0	0	1
VFG022338(gb|WP_010949245)	PE19	PE family protein	Mycobacterium avium subsp. paratuberculosis K-10	ESX-5 (VF0402) - Effector delivery system (VFC0086)	0	1	0	1	1	1	1	1	1	1	1	1	1	1	1	1	1	1	1	1	1	1	1
VFG007970	MAP_RS19265*	- Immune modulation (VFC0258)]	Mycobacterium avium subsp. paratuberculosis K-10	PDIM (VF0309) - Immune modulation (VFC0258)	0	1	1	0	1	1	1	1	1	1	1	1	1	1	1	1	1	1	1	1	1	1	1

## Sheet: TableS5b
Table S5: List of the 199 MAP virulence-related features (i.e. effector genes) from K10 downloaded from the VFDB database and blasted and present on the Mycobacterium avium isolates under comparison
	gene_symbol	description	species	category	M1	M2	M3	M4	M5	M6	M7	M8	M9	M10	M11	M12	M13	M14	M15	DT3	MRI063	MRI064	MRI083	MRI086	MRI090	MRI160	K10
VFG031726(gb|WP_003873718)	regX3	two-component sensory transduction protein RegX	Mycobacterium avium subsp. paratuberculosis K-10	RegX3 (VF0858) - Regulation (VFC0301)	1	1	1	1	1	1	1	1	1	1	1	1	1	1	1	1	1	1	1	1	1	1	1
VFG031514(gb|WP_003878184)	ptpA	low molecular weight phosphotyrosine protein phosphatase	Mycobacterium avium subsp. paratuberculosis K-10	Tyrosine phosphatase (VF0852) - Immune modulation (VFC0258)	1	1	1	1	1	1	1	1	1	1	1	1	1	1	1	1	1	1	1	1	1	1	1
VFG031461(gb|WP_003875860)	ndk	nucleoside-diphosphate kinase	Mycobacterium avium subsp. paratuberculosis K-10	Nucleoside diphosphate kinase (VF0851) - Immune modulation (VFC0258)	1	1	1	1	1	1	1	1	1	1	1	1	1	1	1	1	1	1	1	1	1	1	1
VFG030986(gb|WP_003875682)	fadE29	acyl-CoA dehydrogenase family protein	Mycobacterium avium subsp. paratuberculosis K-10	FadE29 (VF0845) - Nutritional/Metabolic factor (VFC0272)	1	1	1	1	1	1	1	1	1	1	1	1	1	1	1	1	1	1	1	1	1	1	1
VFG030935(gb|WP_003877134)	fadE28	acyl-CoA/acyl-ACP dehydrogenase	Mycobacterium avium subsp. paratuberculosis K-10	FadE28 (VF0844) - Nutritional/Metabolic factor (VFC0272)	1	1	1	1	1	1	1	1	1	1	1	1	1	1	1	1	1	1	1	1	1	1	1
VFG030883(gb|WP_003875680)	cyp125	cytochrome P450	Mycobacterium avium subsp. paratuberculosis K-10	Cyp125 (VF0843) - Nutritional/Metabolic factor (VFC0272)	1	1	1	1	1	1	1	1	1	1	1	1	1	1	1	1	1	1	1	1	1	1	1
VFG030675(gb|WP_003875535)	sugC	sn-glycerol-3-phosphate ABC transporter ATP-binding protein UgpC	Mycobacterium avium subsp. paratuberculosis K-10	Trehalose-recycling ABC transporter (VF0842) - Nutritional/Metabolic factor (VFC0272)	1	1	1	1	1	1	1	1	1	1	1	1	1	1	1	1	1	1	1	1	1	1	1
VFG030620(gb|WP_003875534)	sugB	carbohydrate ABC transporter permease	Mycobacterium avium subsp. paratuberculosis K-10	Trehalose-recycling ABC transporter (VF0842) - Nutritional/Metabolic factor (VFC0272)	1	1	1	1	1	1	1	1	1	1	1	1	1	1	1	1	1	1	1	1	1	1	1
VFG030513(gb|WP_003878456)	lpqY	extracellular solute-binding protein	Mycobacterium avium subsp. paratuberculosis K-10	Trehalose-recycling ABC transporter (VF0842) - Nutritional/Metabolic factor (VFC0272)	1	1	1	1	1	1	1	1	1	1	1	1	1	1	1	1	1	1	1	1	1	1	1
VFG030391(gb|WP_003875182)	fadD13	acyl--CoA ligase	Mycobacterium avium subsp. paratuberculosis K-10	MymA operon (VF0840) - Immune modulation (VFC0258)	1	1	1	1	1	1	1	1	1	1	1	1	1	1	1	1	1	1	1	1	1	1	1
VFG030111(gb|WP_003874576)	kefB	cation:proton antiporter	Mycobacterium avium subsp. paratuberculosis K-10	Potassium/proton antiporter (VF0838) - Immune modulation (VFC0258)	1	1	1	1	1	1	1	1	1	1	1	1	1	1	1	1	1	1	1	1	1	1	1
VFG030056(gb|WP_003877628)	lprG	LppX_LprAFG lipoprotein	Mycobacterium avium subsp. paratuberculosis K-10	Lipoprotein (VF0837) - Immune modulation (VFC0258)	1	1	1	1	1	1	1	1	1	1	1	1	1	1	1	1	1	1	1	1	1	1	1
VFG029991(gb|WP_010949528)	pe	PE-PPE domain-containing protein	Mycobacterium avium subsp. paratuberculosis K-10	GPL locus (VF0841) - Immune modulation (VFC0258)	1	1	1	1	1	1	1	1	1	1	1	1	1	1	1	1	1	1	1	1	1	1	1
VFG029940(gb|WP_003878390)	fad23	AMP-binding protein	Mycobacterium avium subsp. paratuberculosis K-10	GPL locus (VF0841) - Immune modulation (VFC0258)	1	1	1	1	1	1	1	1	1	1	1	1	1	1	1	1	1	1	1	1	1	1	1
VFG029892	mmpL10	- Immune modulation (VFC0258)]	Mycobacterium avium subsp. paratuberculosis K-10	GPL locus (VF0841) - Immune modulation (VFC0258)	1	1	1	1	1	1	1	1	1	1	1	1	1	1	1	1	1	1	1	1	1	1	1
VFG029843(gb|WP_003875897)	papA3	condensation domain-containing protein	Mycobacterium avium subsp. paratuberculosis K-10	GPL locus (VF0841) - Immune modulation (VFC0258)	1	1	1	1	1	1	1	1	1	1	1	1	1	1	1	1	1	1	1	1	1	1	1
VFG029606(gb|WP_003877677)	atf	acyltransferase	Mycobacterium avium subsp. paratuberculosis K-10	GPL locus (VF0841) - Immune modulation (VFC0258)	1	1	1	1	1	1	1	1	1	1	1	1	1	1	1	1	1	1	1	1	1	1	1
VFG029487(gb|WP_003879222)	rmlA	glucose-1-phosphate thymidylyltransferase RfbA	Mycobacterium avium subsp. paratuberculosis K-10	GPL locus (VF0841) - Immune modulation (VFC0258)	1	1	1	1	1	1	1	1	1	1	1	1	1	1	1	1	1	1	1	1	1	1	1
VFG029470(gb|WP_003877631)	MAP_RS05820	hemophore-related protein	Mycobacterium avium subsp. paratuberculosis K-10	GPL locus (VF0841) - Immune modulation (VFC0258)	1	1	1	1	1	1	1	1	1	1	1	1	1	1	1	1	1	1	1	1	1	1	1
VFG029455(gb|WP_010949128)	mmpL4b	RND family transporter	Mycobacterium avium subsp. paratuberculosis K-10	GPL locus (VF0841) - Immune modulation (VFC0258)	1	1	1	1	1	1	1	1	1	1	1	1	1	1	1	1	1	1	1	1	1	1	1
VFG029432(gb|WP_010949129)	mmpL4a	RND family transporter	Mycobacterium avium subsp. paratuberculosis K-10	GPL locus (VF0841) - Immune modulation (VFC0258)	1	1	1	1	1	1	1	1	1	1	1	1	1	1	1	1	1	1	1	1	1	1	1
VFG029387(gb|WP_003876149)	mmpS4	MmpS family protein	Mycobacterium avium subsp. paratuberculosis K-10	GPL locus (VF0841) - Immune modulation (VFC0258)	1	1	1	1	1	1	1	1	1	1	1	1	1	1	1	1	1	1	1	1	1	1	1
VFG022345(gb|WP_003873939)	esxG	Type VII secretion system protein EsxG	Mycobacterium avium subsp. paratuberculosis K-10	ESX-3 (VF0521) - Effector delivery system (VFC0086)	1	1	1	1	1	1	1	1	1	1	1	1	1	1	1	1	1	1	1	1	1	1	1
VFG022298(gb|WP_003876470)	MAP_RS07655	ferredoxin	Mycobacterium avium subsp. paratuberculosis K-10	ESX-5 (VF0402) - Effector delivery system (VFC0086)	1	1	1	1	1	1	1	1	1	1	1	1	1	1	1	1	1	1	1	1	1	1	1
VFG022285	cyp143	- Effector delivery system (VFC0086)]	Mycobacterium avium subsp. paratuberculosis K-10	ESX-5 (VF0402) - Effector delivery system (VFC0086)	1	1	1	1	1	1	1	1	1	1	1	1	1	1	1	1	1	1	1	1	1	1	1
VFG022199(gb|WP_003879501)	esxU	WXG100 family type VII secretion target	Mycobacterium avium subsp. paratuberculosis K-10	ESX-4 (T7SS) (VF0836) - Effector delivery system (VFC0086)	1	1	1	1	1	1	1	1	1	1	1	1	1	1	1	1	1	1	1	1	1	1	1
VFG022183(gb|WP_003873432)	esxT	WXG100 family type VII secretion target	Mycobacterium avium subsp. paratuberculosis K-10	ESX-4 (T7SS) (VF0836) - Effector delivery system (VFC0086)	1	1	1	1	1	1	1	1	1	1	1	1	1	1	1	1	1	1	1	1	1	1	1
VFG022167	eccE3	- Effector delivery system (VFC0086)]	Mycobacterium avium subsp. paratuberculosis K-10	ESX-3 (VF0521) - Effector delivery system (VFC0086)	1	1	1	1	1	1	1	1	1	1	1	1	1	1	1	1	1	1	1	1	1	1	1
VFG022119(gb|WP_003879186)	espG3	Type VII secretion system protein EspG3	Mycobacterium avium subsp. paratuberculosis K-10	ESX-3 (VF0521) - Effector delivery system (VFC0086)	1	1	1	1	1	1	1	1	1	1	1	1	1	1	1	1	1	1	1	1	1	1	1
VFG022103(gb|WP_003879185)	esxH	Type VII secretion system protein ESXH (10 kDa antigen	Mycobacterium avium subsp. paratuberculosis K-10	ESX-3 (VF0521) - Effector delivery system (VFC0086)	1	1	1	1	1	1	1	1	1	1	1	1	1	1	1	1	1	1	1	1	1	1	1
VFG022071(gb|WP_010950108)	PE5	PE family protein	Mycobacterium avium subsp. paratuberculosis K-10	ESX-3 (VF0521) - Effector delivery system (VFC0086)	1	1	1	1	1	1	1	1	1	1	1	1	1	1	1	1	1	1	1	1	1	1	1
VFG022040(gb|WP_003879179)	eccB3	Type VII secretion system protein EccB3	Mycobacterium avium subsp. paratuberculosis K-10	ESX-3 (VF0521) - Effector delivery system (VFC0086)	1	1	1	1	1	1	1	1	1	1	1	1	1	1	1	1	1	1	1	1	1	1	1
VFG022009(gb|WP_010950308)	eccC2	type VII secretion protein EccC	Mycobacterium avium subsp. paratuberculosis K-10	ESX-2 (T7SS) (VF0834) - Effector delivery system (VFC0086)	1	1	1	1	1	1	1	1	1	1	1	1	1	1	1	1	1	1	1	1	1	1	1
VFG022001(gb|WP_003876365)	PE36	PE domain-containing protein	Mycobacterium avium subsp. paratuberculosis K-10	ESX-2 (T7SS) (VF0834) - Effector delivery system (VFC0086)	1	1	1	1	1	1	1	1	1	1	1	1	1	1	1	1	1	1	1	1	1	1	1
VFG021985(gb|WP_011723369)	esxD	WXG100 family type VII secretion target	Mycobacterium avium subsp. paratuberculosis K-10	ESX-2 (T7SS) (VF0834) - Effector delivery system (VFC0086)	1	1	1	1	1	1	1	1	1	1	1	1	1	1	1	1	1	1	1	1	1	1	1
VFG021977(gb|WP_003876587)	esxC	WXG100 family type VII secretion target	Mycobacterium avium subsp. paratuberculosis K-10	ESX-2 (T7SS) (VF0834) - Effector delivery system (VFC0086)	1	1	1	1	1	1	1	1	1	1	1	1	1	1	1	1	1	1	1	1	1	1	1
VFG021961(gb|WP_003876911)	MAP_RS00820	MinD/ParA family protein	Mycobacterium avium subsp. paratuberculosis K-10	ESX-2 (T7SS) (VF0834) - Effector delivery system (VFC0086)	1	1	1	1	1	1	1	1	1	1	1	1	1	1	1	1	1	1	1	1	1	1	1
VFG021929(gb|WP_042632956)	eccA2	type VII secretion system ESX-2 AAA family ATPase EccA2	Mycobacterium avium subsp. paratuberculosis K-10	ESX-2 (T7SS) (VF0834) - Effector delivery system (VFC0086)	1	1	1	1	1	1	1	1	1	1	1	1	1	1	1	1	1	1	1	1	1	1	1
VFG021913(gb|WP_003872292)	espR	ESX-1 transcriptional regulator EspR	Mycobacterium avium subsp. paratuberculosis K-10	ESX-1 (VF0315) - Effector delivery system (VFC0086)	1	1	1	1	1	1	1	1	1	1	1	1	1	1	1	1	1	1	1	1	1	1	1
VFG021845(gb|WP_003874876)	mbtK	Lysine N-acetyltransferase MbtK	Mycobacterium avium subsp. paratuberculosis K-10	Mycobactin (VF0299) - Nutritional/Metabolic factor (VFC0272)	1	1	1	1	1	1	1	1	1	1	1	1	1	1	1	1	1	1	1	1	1	1	1
VFG021832(gb|WP_003877913)	mbtN	Acyl-CoA dehydrogenase MbtN	Mycobacterium avium subsp. paratuberculosis K-10	Mycobactin (VF0299) - Nutritional/Metabolic factor (VFC0272)	1	1	1	1	1	1	1	1	1	1	1	1	1	1	1	1	1	1	1	1	1	1	1
VFG021818(gb|WP_003877914)	mbtM	Probable fatty acyl-AMP ligase MbtM	Mycobacterium avium subsp. paratuberculosis K-10	Mycobactin (VF0299) - Nutritional/Metabolic factor (VFC0272)	1	1	1	1	1	1	1	1	1	1	1	1	1	1	1	1	1	1	1	1	1	1	1
VFG021805(gb|WP_019306489)	mbtL	Acyl carrier protein (ACP	Mycobacterium avium subsp. paratuberculosis K-10	Mycobactin (VF0299) - Nutritional/Metabolic factor (VFC0272)	1	1	1	1	1	1	1	1	1	1	1	1	1	1	1	1	1	1	1	1	1	1	1
VFG017616(gb|WP_003874404)	esxM	WXG100 family type VII secretion target	Mycobacterium avium subsp. paratuberculosis K-10	ESX-5 (VF0402) - Effector delivery system (VFC0086)	1	1	1	1	1	1	1	1	1	1	1	1	1	1	1	1	1	1	1	1	1	1	1
VFG010435(gb|WP_010948739)	mce9F	MlaD family protein	Mycobacterium avium subsp. paratuberculosis K-10	Mce9 (VF0832) - Others (VFC0346)	1	1	1	1	1	1	1	1	1	1	1	1	1	1	1	1	1	1	1	1	1	1	1
VFG010433(gb|WP_003876029)	mce9E	MCE family protein	Mycobacterium avium subsp. paratuberculosis K-10	Mce9 (VF0832) - Others (VFC0346)	1	1	1	1	1	1	1	1	1	1	1	1	1	1	1	1	1	1	1	1	1	1	1
VFG010431(gb|WP_003876028)	mce9D	MCE family protein	Mycobacterium avium subsp. paratuberculosis K-10	Mce9 (VF0832) - Others (VFC0346)	1	1	1	1	1	1	1	1	1	1	1	1	1	1	1	1	1	1	1	1	1	1	1
VFG010429(gb|WP_003876027)	mce9C	MCE family protein	Mycobacterium avium subsp. paratuberculosis K-10	Mce9 (VF0832) - Others (VFC0346)	1	1	1	1	1	1	1	1	1	1	1	1	1	1	1	1	1	1	1	1	1	1	1
VFG010427(gb|WP_003876026)	mce9B	MCE family protein	Mycobacterium avium subsp. paratuberculosis K-10	Mce9 (VF0832) - Others (VFC0346)	1	1	1	1	1	1	1	1	1	1	1	1	1	1	1	1	1	1	1	1	1	1	1
VFG010425(gb|WP_015632714)	mce9A	MCE family protein	Mycobacterium avium subsp. paratuberculosis K-10	Mce9 (VF0832) - Others (VFC0346)	1	1	1	1	1	1	1	1	1	1	1	1	1	1	1	1	1	1	1	1	1	1	1
VFG010419(gb|WP_010949511)	mce8F	MCE family protein	Mycobacterium avium subsp. paratuberculosis K-10	Mce8 (VF0831) - Others (VFC0346)	1	1	1	1	1	1	1	1	1	1	1	1	1	1	1	1	1	1	1	1	1	1	1
VFG010412	mce8E	- Others (VFC0346)]	Mycobacterium avium subsp. paratuberculosis K-10	Mce8 (VF0831) - Others (VFC0346)	1	1	1	1	1	1	1	1	1	1	1	1	1	1	1	1	1	1	1	1	1	1	1
VFG010405(gb|WP_003875939)	mce8D	MCE family protein	Mycobacterium avium subsp. paratuberculosis K-10	Mce8 (VF0831) - Others (VFC0346)	1	1	1	1	1	1	1	1	1	1	1	1	1	1	1	1	1	1	1	1	1	1	1
VFG010391(gb|WP_003875941)	mce8B	MCE family protein	Mycobacterium avium subsp. paratuberculosis K-10	Mce8 (VF0831) - Others (VFC0346)	1	1	1	1	1	1	1	1	1	1	1	1	1	1	1	1	1	1	1	1	1	1	1
VFG010384(gb|WP_003875942)	mce8A	MCE family protein	Mycobacterium avium subsp. paratuberculosis K-10	Mce8 (VF0831) - Others (VFC0346)	1	1	1	1	1	1	1	1	1	1	1	1	1	1	1	1	1	1	1	1	1	1	1
VFG010375(gb|WP_003872967)	mce7F	MCE family protein	Mycobacterium avium subsp. paratuberculosis K-10	Mce7 (VF0830) - Others (VFC0346)	1	1	1	1	1	1	1	1	1	1	1	1	1	1	1	1	1	1	1	1	1	1	1
VFG010367(gb|WP_003872968)	mce7E	MCE family protein	Mycobacterium avium subsp. paratuberculosis K-10	Mce7 (VF0830) - Others (VFC0346)	1	1	1	1	1	1	1	1	1	1	1	1	1	1	1	1	1	1	1	1	1	1	1
VFG010358	mce7D	- Others (VFC0346)]	Mycobacterium avium subsp. paratuberculosis K-10	Mce7 (VF0830) - Others (VFC0346)	1	1	1	1	1	1	1	1	1	1	1	1	1	1	1	1	1	1	1	1	1	1	1
VFG010340(gb|WP_010948961)	mce7B	MCE family protein	Mycobacterium avium subsp. paratuberculosis K-10	Mce7 (VF0830) - Others (VFC0346)	1	1	1	1	1	1	1	1	1	1	1	1	1	1	1	1	1	1	1	1	1	1	1
VFG010331(gb|WP_003872972)	mce7A	MCE family protein	Mycobacterium avium subsp. paratuberculosis K-10	Mce7 (VF0830) - Others (VFC0346)	1	1	1	1	1	1	1	1	1	1	1	1	1	1	1	1	1	1	1	1	1	1	1
VFG010319(gb|WP_010949380)	mce5F	MlaD family protein	Mycobacterium avium subsp. paratuberculosis K-10	Mce5 (VF0828) - Others (VFC0346)	1	1	1	1	1	1	1	1	1	1	1	1	1	1	1	1	1	1	1	1	1	1	1
VFG010313(gb|WP_003872182)	mce5E	MlaD family protein	Mycobacterium avium subsp. paratuberculosis K-10	Mce5 (VF0828) - Others (VFC0346)	1	1	1	1	1	1	1	1	1	1	1	1	1	1	1	1	1	1	1	1	1	1	1
VFG010308(gb|WP_010949379)	mce5D	MCE family protein	Mycobacterium avium subsp. paratuberculosis K-10	Mce5 (VF0828) - Others (VFC0346)	1	1	1	1	1	1	1	1	1	1	1	1	1	1	1	1	1	1	1	1	1	1	1
VFG010302(gb|WP_029245094)	mce5C	MCE family protein	Mycobacterium avium subsp. paratuberculosis K-10	Mce5 (VF0828) - Others (VFC0346)	1	1	1	1	1	1	1	1	1	1	1	1	1	1	1	1	1	1	1	1	1	1	1
VFG010296(gb|WP_003872179)	mce5B	MCE family protein	Mycobacterium avium subsp. paratuberculosis K-10	Mce5 (VF0828) - Others (VFC0346)	1	1	1	1	1	1	1	1	1	1	1	1	1	1	1	1	1	1	1	1	1	1	1
VFG010290(gb|WP_003872178)	mce5A	MCE family protein	Mycobacterium avium subsp. paratuberculosis K-10	Mce5 (VF0828) - Others (VFC0346)	1	1	1	1	1	1	1	1	1	1	1	1	1	1	1	1	1	1	1	1	1	1	1
VFG010254(gb|WP_010948893)	mce4D	virulence factor Mce family protein	Mycobacterium avium subsp. paratuberculosis K-10	Mce4 (VF0827) - Immune modulation (VFC0258)	1	1	1	1	1	1	1	1	1	1	1	1	1	1	1	1	1	1	1	1	1	1	1
VFG010240(gb|WP_170924195)	mce4C	virulence factor Mce family protein	Mycobacterium avium subsp. paratuberculosis K-10	Mce4 (VF0827) - Immune modulation (VFC0258)	1	1	1	1	1	1	1	1	1	1	1	1	1	1	1	1	1	1	1	1	1	1	1
VFG010226(gb|WP_010948892)	mce4B	virulence factor Mce family protein	Mycobacterium avium subsp. paratuberculosis K-10	Mce4 (VF0827) - Immune modulation (VFC0258)	1	1	1	1	1	1	1	1	1	1	1	1	1	1	1	1	1	1	1	1	1	1	1
VFG010212(gb|WP_003875720)	mce4A	virulence factor Mce family protein	Mycobacterium avium subsp. paratuberculosis K-10	Mce4 (VF0827) - Immune modulation (VFC0258)	1	1	1	1	1	1	1	1	1	1	1	1	1	1	1	1	1	1	1	1	1	1	1
VFG010187(gb|WP_003872483)	mce3F	MCE family protein	Mycobacterium avium subsp. paratuberculosis K-10	Mce3 (VF0826) - Immune modulation (VFC0258)	1	1	1	1	1	1	1	1	1	1	1	1	1	1	1	1	1	1	1	1	1	1	1
VFG010141(gb|WP_003872485)	mce3D	MCE family protein	Mycobacterium avium subsp. paratuberculosis K-10	Mce3 (VF0826) - Immune modulation (VFC0258)	1	1	1	1	1	1	1	1	1	1	1	1	1	1	1	1	1	1	1	1	1	1	1
VFG010118(gb|WP_010949483)	mce3C	MCE family protein	Mycobacterium avium subsp. paratuberculosis K-10	Mce3 (VF0826) - Immune modulation (VFC0258)	1	1	1	1	1	1	1	1	1	1	1	1	1	1	1	1	1	1	1	1	1	1	1
VFG010073(gb|WP_003878304)	mce3A	MCE family protein	Mycobacterium avium subsp. paratuberculosis K-10	Mce3 (VF0826) - Immune modulation (VFC0258)	1	1	1	1	1	1	1	1	1	1	1	1	1	1	1	1	1	1	1	1	1	1	1
VFG010063(gb|WP_003879393)	mce2F	MCE family protein	Mycobacterium avium subsp. paratuberculosis K-10	Mce2 (VF0825) - Immune modulation (VFC0258)	1	1	1	1	1	1	1	1	1	1	1	1	1	1	1	1	1	1	1	1	1	1	1
VFG010039(gb|WP_010950231)	mce2D	virulence factor Mce family protein	Mycobacterium avium subsp. paratuberculosis K-10	Mce2 (VF0825) - Immune modulation (VFC0258)	1	1	1	1	1	1	1	1	1	1	1	1	1	1	1	1	1	1	1	1	1	1	1
VFG010015(gb|WP_003873596)	mce2B	MCE family protein	Mycobacterium avium subsp. paratuberculosis K-10	Mce2 (VF0825) - Immune modulation (VFC0258)	1	1	1	1	1	1	1	1	1	1	1	1	1	1	1	1	1	1	1	1	1	1	1
VFG010002	mce2A	- Immune modulation (VFC0258)]	Mycobacterium avium subsp. paratuberculosis K-10	Mce2 (VF0825) - Immune modulation (VFC0258)	1	1	1	1	1	1	1	1	1	1	1	1	1	1	1	1	1	1	1	1	1	1	1
VFG009992(gb|WP_003874126)	mce1F	MCE family protein	Mycobacterium avium subsp. paratuberculosis K-10	Mce1 (VF0824) - Nutritional/Metabolic factor (VFC0272)	1	1	1	1	1	1	1	1	1	1	1	1	1	1	1	1	1	1	1	1	1	1	1
VFG009972(gb|WP_003879092)	mce1D	virulence factor Mce family protein	Mycobacterium avium subsp. paratuberculosis K-10	Mce1 (VF0824) - Nutritional/Metabolic factor (VFC0272)	1	1	1	1	1	1	1	1	1	1	1	1	1	1	1	1	1	1	1	1	1	1	1
VFG009952(gb|WP_003874130)	mce1B	virulence factor Mce family protein	Mycobacterium avium subsp. paratuberculosis K-10	Mce1 (VF0824) - Nutritional/Metabolic factor (VFC0272)	1	1	1	1	1	1	1	1	1	1	1	1	1	1	1	1	1	1	1	1	1	1	1
VFG009924(gb|WP_003877578)	relA	Probable GTP pyrophosphokinase RelA (ATP:GTP 3'-pyrophosphotransferase	Mycobacterium avium subsp. paratuberculosis K-10	RelA (VF0287) - Regulation (VFC0301)	1	1	1	1	1	1	1	1	1	1	1	1	1	1	1	1	1	1	1	1	1	1	1
VFG009907(gb|WP_003878870)	devS	GAF domain-containing sensor histidine kinase	Mycobacterium avium subsp. paratuberculosis K-10	DevRS (VF0317) - Regulation (VFC0301)	1	1	1	1	1	1	1	1	1	1	1	1	1	1	1	1	1	1	1	1	1	1	1
VFG009889(gb|WP_003874670)	devR/dosR	response regulator transcription factor	Mycobacterium avium subsp. paratuberculosis K-10	DevRS (VF0317) - Regulation (VFC0301)	1	1	1	1	1	1	1	1	1	1	1	1	1	1	1	1	1	1	1	1	1	1	1
VFG009874(gb|WP_003877497)	mprB	HAMP domain-containing histidine kinase	Mycobacterium avium subsp. paratuberculosis K-10	MprAB (VF0298) - Regulation (VFC0301)	1	1	1	1	1	1	1	1	1	1	1	1	1	1	1	1	1	1	1	1	1	1	1
VFG009859(gb|WP_003872811)	mprA	two-component system response regulator MprA	Mycobacterium avium subsp. paratuberculosis K-10	MprAB (VF0298) - Regulation (VFC0301)	1	1	1	1	1	1	1	1	1	1	1	1	1	1	1	1	1	1	1	1	1	1	1
VFG009844	prrB	- Regulation (VFC0301)]	Mycobacterium avium subsp. paratuberculosis K-10	PrrA/B (VF0823) - Regulation (VFC0301)	1	1	1	1	1	1	1	1	1	1	1	1	1	1	1	1	1	1	1	1	1	1	1
VFG009829(gb|WP_024637144)	prrA	two-component system response regulator PrrA	Mycobacterium avium subsp. paratuberculosis K-10	PrrA/B (VF0823) - Regulation (VFC0301)	1	1	1	1	1	1	1	1	1	1	1	1	1	1	1	1	1	1	1	1	1	1	1
VFG009801(gb|WP_010948903)	phoP	Possible two component system response transcriptional positive regulator PhoP	Mycobacterium avium subsp. paratuberculosis K-10	PhoP (VF0286) - Regulation (VFC0301)	1	1	1	1	1	1	1	1	1	1	1	1	1	1	1	1	1	1	1	1	1	1	1
VFG009786(gb|WP_003874400)	whiB3	WhiB family transcriptional regulator	Mycobacterium avium subsp. paratuberculosis K-10	WhiB3 (VF0288) - Regulation (VFC0301)	1	1	1	1	1	1	1	1	1	1	1	1	1	1	1	1	1	1	1	1	1	1	1
VFG009772(gb|WP_003874356)	sigM	RNA polymerase sigma factor SigM	Mycobacterium avium subsp. paratuberculosis K-10	Sigma M (VF0822) - Regulation (VFC0301)	1	1	1	1	1	1	1	1	1	1	1	1	1	1	1	1	1	1	1	1	1	1	1
VFG009758(gb|WP_003878913)	sigH	sigma-70 family RNA polymerase sigma factor	Mycobacterium avium subsp. paratuberculosis K-10	SigH (VF0296) - Regulation (VFC0301)	1	1	1	1	1	1	1	1	1	1	1	1	1	1	1	1	1	1	1	1	1	1	1
VFG009743(gb|WP_003875522)	sigE	RNA polymerase sigma factor SigE	Mycobacterium avium subsp. paratuberculosis K-10	SigE (VF0295) - Regulation (VFC0301)	1	1	1	1	1	1	1	1	1	1	1	1	1	1	1	1	1	1	1	1	1	1	1
VFG009729(gb|WP_003878969)	sigF	RNA polymerase sigma factor SigF	Mycobacterium avium subsp. paratuberculosis K-10	SigF (VF0294) - Regulation (VFC0301)	1	1	1	1	1	1	1	1	1	1	1	1	1	1	1	1	1	1	1	1	1	1	1
VFG009714(gb|WP_010949738)	sigA/rpoV	RNA polymerase sigma factor	Mycobacterium avium subsp. paratuberculosis K-10	SigA (VF0257) - Regulation (VFC0301)	1	1	1	1	1	1	1	1	1	1	1	1	1	1	1	1	1	1	1	1	1	1	1
VFG009701(gb|WP_010948769)	sodA	superoxide dismutase	Mycobacterium avium subsp. paratuberculosis K-10	SodA (VF0304) - Stress survival (VFC0282)	1	1	1	1	1	1	1	1	1	1	1	1	1	1	1	1	1	1	1	1	1	1	1
VFG009676(gb|WP_003876555)	ahpC	peroxiredoxin	Mycobacterium avium subsp. paratuberculosis K-10	AhpC (VF0306) - Stress survival (VFC0282)	1	1	1	1	1	1	1	1	1	1	1	1	1	1	1	1	1	1	1	1	1	1	1
VFG009632(gb|WP_003875458)	narI	respiratory nitrate reductase subunit gamma	Mycobacterium avium subsp. paratuberculosis K-10	Nitrate reductase (VF0302) - Nutritional/Metabolic factor (VFC0272)	1	1	1	1	1	1	1	1	1	1	1	1	1	1	1	1	1	1	1	1	1	1	1
VFG009619(gb|WP_019305597)	narJ	nitrate reductase molybdenum cofactor assembly chaperone	Mycobacterium avium subsp. paratuberculosis K-10	Nitrate reductase (VF0302) - Nutritional/Metabolic factor (VFC0272)	1	1	1	1	1	1	1	1	1	1	1	1	1	1	1	1	1	1	1	1	1	1	1
VFG009606(gb|WP_003875456)	narH	nitrate reductase subunit beta	Mycobacterium avium subsp. paratuberculosis K-10	Nitrate reductase (VF0302) - Nutritional/Metabolic factor (VFC0272)	1	1	1	1	1	1	1	1	1	1	1	1	1	1	1	1	1	1	1	1	1	1	1
VFG009593(gb|WP_010949671)	narG	nitrate reductase subunit alpha	Mycobacterium avium subsp. paratuberculosis K-10	Nitrate reductase (VF0302) - Nutritional/Metabolic factor (VFC0272)	1	1	1	1	1	1	1	1	1	1	1	1	1	1	1	1	1	1	1	1	1	1	1
VFG009566(gb|WP_003875926)	mbtI	Isochorismate synthase MbtI	Mycobacterium avium subsp. paratuberculosis K-10	Mycobactin (VF0299) - Nutritional/Metabolic factor (VFC0272)	1	1	1	1	1	1	1	1	1	1	1	1	1	1	1	1	1	1	1	1	1	1	1
VFG009558(gb|WP_010949514)	mbtJ	Putative acetyl hydrolase MbtJ	Mycobacterium avium subsp. paratuberculosis K-10	Mycobactin (VF0299) - Nutritional/Metabolic factor (VFC0272)	1	1	1	1	1	1	1	1	1	1	1	1	1	1	1	1	1	1	1	1	1	1	1
VFG009544	mbtA	+ salicyl-S-ArCP synthetase	Mycobacterium avium subsp. paratuberculosis K-10	Mycobactin (VF0299) - Nutritional/Metabolic factor (VFC0272)	1	1	1	1	1	1	1	1	1	1	1	1	1	1	1	1	1	1	1	1	1	1	1
VFG009516(gb|WP_033706523)	mbtC	Polyketide synthetase MbtC (polyketide synthase	Mycobacterium avium subsp. paratuberculosis K-10	Mycobactin (VF0299) - Nutritional/Metabolic factor (VFC0272)	1	1	1	1	1	1	1	1	1	1	1	1	1	1	1	1	1	1	1	1	1	1	1
VFG009460(gb|WP_003878341)	mbtG	Lysine-N-oxygenase MbtG (L-lysine 6-monooxygenase	Mycobacterium avium subsp. paratuberculosis K-10	Mycobactin (VF0299) - Nutritional/Metabolic factor (VFC0272)	1	1	1	1	1	1	1	1	1	1	1	1	1	1	1	1	1	1	1	1	1	1	1
VFG009446(gb|WP_003875997)	mbtH	putative protein MbtH	Mycobacterium avium subsp. paratuberculosis K-10	Mycobactin (VF0299) - Nutritional/Metabolic factor (VFC0272)	1	1	1	1	1	1	1	1	1	1	1	1	1	1	1	1	1	1	1	1	1	1	1
VFG009431(gb|WP_003878619)	ideR	Iron-dependent repressor and activator IdeR	Mycobacterium avium subsp. paratuberculosis K-10	IdeR (VF0300) - Regulation (VFC0301)	1	1	1	1	1	1	1	1	1	1	1	1	1	1	1	1	1	1	1	1	1	1	1
VFG009402(gb|WP_003872332)	glnA1	type I glutamate--ammonia ligase	Mycobacterium avium subsp. paratuberculosis K-10	Glutamine synthesis (VF0816) - Nutritional/Metabolic factor (VFC0272)	1	1	1	1	1	1	1	1	1	1	1	1	1	1	1	1	1	1	1	1	1	1	1
VFG009387(gb|WP_003877287)	lysA	diaminopimelate decarboxylase	Mycobacterium avium subsp. paratuberculosis K-10	Lysine synthesis (VF0815) - Nutritional/Metabolic factor (VFC0272)	1	1	1	1	1	1	1	1	1	1	1	1	1	1	1	1	1	1	1	1	1	1	1
VFG009372(gb|WP_003875017)	leuD	3-isopropylmalate dehydratase small subunit	Mycobacterium avium subsp. paratuberculosis K-10	Leucine synthesis (VF0814) - Nutritional/Metabolic factor (VFC0272)	1	1	1	1	1	1	1	1	1	1	1	1	1	1	1	1	1	1	1	1	1	1	1
VFG009357	trpD	- Nutritional/Metabolic factor (VFC0272)]	Mycobacterium avium subsp. paratuberculosis K-10	Tryptophan synthesis (VF0813) - Nutritional/Metabolic factor (VFC0272)	1	1	1	1	1	1	1	1	1	1	1	1	1	1	1	1	1	1	1	1	1	1	1
VFG009342(gb|WP_172799599)	proC	pyrroline-5-carboxylate reductase	Mycobacterium avium subsp. paratuberculosis K-10	Proline synthesis (VF0812) - Nutritional/Metabolic factor (VFC0272)	1	1	1	1	1	1	1	1	1	1	1	1	1	1	1	1	1	1	1	1	1	1	1
VFG009262(gb|WP_010950181)	icl	Isocitrate lyase Icl (isocitrase	Mycobacterium avium subsp. paratuberculosis K-10	Isocitrate lyase (VF0253) - Others (VFC0346)	1	1	1	1	1	1	1	1	1	1	1	1	1	1	1	1	1	1	1	1	1	1	1
VFG009254(gb|WP_170936881)	sapM	acid phosphatase	Mycobacterium avium subsp. paratuberculosis K-10	Lipid phosphatase (VF0810) - Immune modulation (VFC0258)	1	1	1	1	1	1	1	1	1	1	1	1	1	1	1	1	1	1	1	1	1	1	1
VFG009195(gb|WP_003877893)	eccE5	ESX-5 type VII secretion system EccE5	Mycobacterium avium subsp. paratuberculosis K-10	ESX-5 (VF0402) - Effector delivery system (VFC0086)	1	1	1	1	1	1	1	1	1	1	1	1	1	1	1	1	1	1	1	1	1	1	1
VFG009185(gb|WP_003877894)	eccA5	ESX-5 type VII secretion system AAA+ ATPase EccA5	Mycobacterium avium subsp. paratuberculosis K-10	ESX-5 (VF0402) - Effector delivery system (VFC0086)	1	1	1	1	1	1	1	1	1	1	1	1	1	1	1	1	1	1	1	1	1	1	1
VFG009092(gb|WP_010949246)	eccD5	ESX-5 type VII secretion system EccD5	Mycobacterium avium subsp. paratuberculosis K-10	ESX-5 (VF0402) - Effector delivery system (VFC0086)	1	1	1	1	1	1	1	1	1	1	1	1	1	1	1	1	1	1	1	1	1	1	1
VFG008248(gb|WP_003873405)	lpqH	lipoprotein LpqH	Mycobacterium avium subsp. paratuberculosis K-10	19-kD protein (VF0806) - Immune modulation (VFC0258)	1	1	1	1	1	1	1	1	1	1	1	1	1	1	1	1	1	1	1	1	1	1	1
VFG008169(gb|WP_003874240)	fbpC	Secreted antigen 85-C FbpC (85C	Mycobacterium avium subsp. paratuberculosis K-10	Antigen 85 (VF0311) - Adherence (VFC0001)	1	1	1	1	1	1	1	1	1	1	1	1	1	1	1	1	1	1	1	1	1	1	1
VFG008159(gb|WP_010949276)	fbpB	Secreted antigen 85-B FbpB (85B	Mycobacterium avium subsp. paratuberculosis K-10	Antigen 85 (VF0311) - Adherence (VFC0001)	1	1	1	1	1	1	1	1	1	1	1	1	1	1	1	1	1	1	1	1	1	1	1
VFG008149(gb|WP_003872573)	fbpA	Secreted antigen 85-a FbpA (mycolyl transferase 85A	Mycobacterium avium subsp. paratuberculosis K-10	Antigen 85 (VF0311) - Adherence (VFC0001)	1	1	1	1	1	1	1	1	1	1	1	1	1	1	1	1	1	1	1	1	1	1	1
VFG008013(gb|WP_003873099)	eis	acetyltransferase	Mycobacterium avium subsp. paratuberculosis K-10	Enhanced intracellular survival protein (VF0807) - Antimicrobial activity/Competitive advantage (VFC0325)	1	1	1	1	1	1	1	1	1	1	1	1	1	1	1	1	1	1	1	1	1	1	1
VFG007985(gb|WP_003872491)	stf0	Stf0 sulfotransferase family protein	Mycobacterium avium subsp. paratuberculosis K-10	Sulfolipid-1 biosynthesis and transport (VF0803) - Immune modulation (VFC0258)	1	1	1	1	1	1	1	1	1	1	1	1	1	1	1	1	1	1	1	1	1	1	1
VFG007951(gb|WP_003876142)	MAP_RS06265	glycosyltransferase	Mycobacterium avium subsp. paratuberculosis K-10	PDIM (VF0309) - Immune modulation (VFC0258)	1	1	1	1	1	1	1	1	1	1	1	1	1	1	1	1	1	1	1	1	1	1	1
VFG007937(gb|WP_010949127)	drrC	ABC transporter permease	Mycobacterium avium subsp. paratuberculosis K-10	PDIM (VF0309) - Immune modulation (VFC0258)	1	1	1	1	1	1	1	1	1	1	1	1	1	1	1	1	1	1	1	1	1	1	1
VFG007923(gb|WP_003876145)	ddrB	ABC transporter permease	Mycobacterium avium subsp. paratuberculosis K-10	PDIM (VF0309) - Immune modulation (VFC0258)	1	1	1	1	1	1	1	1	1	1	1	1	1	1	1	1	1	1	1	1	1	1	1
VFG007785(gb|WP_010950094)	fadD28	AMP-binding protein	Mycobacterium avium subsp. paratuberculosis K-10	PDIM (VF0309) - Immune modulation (VFC0258)	1	1	1	1	1	1	1	1	1	1	1	1	1	1	1	1	1	1	1	1	1	1	1
VFG007759(gb|WP_003873565)	mmaA4	class I SAM-dependent methyltransferase	Mycobacterium avium subsp. paratuberculosis K-10	MmaA4 (VF0314) - Others (VFC0346)	1	1	1	1	1	1	1	1	1	1	1	1	1	1	1	1	1	1	1	1	1	1	1
VFG007749(gb|WP_010950197)	cmaA2	class I SAM-dependent methyltransferase	Mycobacterium avium subsp. paratuberculosis K-10	Mycolic acid trans-cyclopropane synthetase (VF0802) - Others (VFC0346)	1	1	1	1	1	1	1	1	1	1	1	1	1	1	1	1	1	1	1	1	1	1	1
VFG007735(gb|WP_010950183)	pcaA	class I SAM-dependent methyltransferase	Mycobacterium avium subsp. paratuberculosis K-10	PcaA (VF0285) - Others (VFC0346)	1	1	1	1	1	1	1	1	1	1	1	1	1	1	1	1	1	1	1	1	1	1	1
